# Supplementary material for: Comparative analysis of the transcriptomes of EDL, psoas, and soleus muscles from mice
Source: BMC Genomics. 2020 Nov 19;21:808. doi: 10.1186/s12864-020-07225-2 (PMC7678079; doi:10.1186/s12864-020-07225-2)
Supplement: Supplementary file 5 — Additional file 5. Gene ontologies and differential gene expression analysis results associated with the genes in cluster 4 identified from k-means clustering of differentially expressed genes. [file 12864_2020_7225_MOESM5_ESM.xlsx]

## Sheet: EnrichGO_GeneCluster4
	ONTOLOGY	ID	Description	GeneRatio	BgRatio	pvalue	p.adjust	qvalue	geneID	Count
GO:0030016	CC	GO:0030016	myofibril	20/240	212/23436	6.99128e-14	2.34208e-11	1.9502e-11	Actn3/Casq1/Pgm2/Ppp3ca/Tmod1/Pde4b/Aldoa/Pak1/Myom2/Pygm/Ky/Mybpc2/Grk3/Slc8a1/Myh4/Myh13/Tnnt3/Myl1/Actc1/Myoz1	20
GO:0043292	CC	GO:0043292	contractile fiber	20/240	226/23436	2.34858e-13	3.93387e-11	3.27565e-11	Actn3/Casq1/Pgm2/Ppp3ca/Tmod1/Pde4b/Aldoa/Pak1/Myom2/Pygm/Ky/Mybpc2/Grk3/Slc8a1/Myh4/Myh13/Tnnt3/Myl1/Actc1/Myoz1	20
GO:0030017	CC	GO:0030017	sarcomere	17/240	189/23436	1.19529e-11	1.33475e-09	1.11141e-09	Actn3/Casq1/Pgm2/Ppp3ca/Tmod1/Pde4b/Aldoa/Pak1/Myom2/Pygm/Ky/Mybpc2/Grk3/Slc8a1/Tnnt3/Actc1/Myoz1	17
GO:0031674	CC	GO:0031674	I band	15/240	142/23436	1.99063e-11	1.66716e-09	1.38821e-09	Actn3/Casq1/Pgm2/Ppp3ca/Pde4b/Aldoa/Pak1/Myom2/Pygm/Ky/Mybpc2/Grk3/Slc8a1/Actc1/Myoz1	15
GO:0044449	CC	GO:0044449	contractile fiber part	17/240	203/23436	3.74007e-11	2.50585e-09	2.08657e-09	Actn3/Casq1/Pgm2/Ppp3ca/Tmod1/Pde4b/Aldoa/Pak1/Myom2/Pygm/Ky/Mybpc2/Grk3/Slc8a1/Tnnt3/Actc1/Myoz1	17
GO:0030018	CC	GO:0030018	Z disc	14/240	130/23436	7.28498e-11	4.06745e-09	3.38688e-09	Actn3/Casq1/Pgm2/Ppp3ca/Pde4b/Aldoa/Pak1/Myom2/Pygm/Ky/Mybpc2/Grk3/Slc8a1/Myoz1	14
GO:0003012	BP	GO:0003012	muscle system process	22/236	392/23210	1.08365e-10	2.88792e-07	2.60532e-07	Actn3/Casq1/Pgam2/Mstn/Igfbp5/Mylk2/Ppp3ca/Tmod1/Pde4b/Clcn1/Aldoa/Pak1/Myom2/Mybpc2/Adora1/Slc8a1/Myh8/Myh4/Tnnt3/Myl1/Actc1/Myoz1	22
GO:0016052	BP	GO:0016052	carbohydrate catabolic process	14/236	142/23210	2.17565e-10	2.89905e-07	2.61536e-07	Gm2a/Actn3/Prkag3/Pgam2/Gpd1/Tpi1/Pgm2/Aldoa/Pygm/Pfkm/Gpi1/Stbd1/Eno3/Pgk1	14
GO:0051146	BP	GO:0051146	striated muscle cell differentiation	19/236	316/23210	6.79447e-10	6.03576e-07	5.44511e-07	Actn3/Casq1/Rarb/Popdc2/Igfbp5/Mylk2/Ppp3ca/Tmod1/Pak1/Myom2/Mybpc2/Myorg/Plpp7/Slc8a1/Tnnt3/Hacd1/Actc1/Myoz1/Sort1	19
GO:0046394	BP	GO:0046394	carboxylic acid biosynthetic process	19/236	362/23210	6.38748e-09	1.99337e-06	1.7983e-06	Actn3/Prkag3/Gamt/Pgam2/Gpd1/Tpi1/Cyp27a1/Glul/Prxl2b/Aldoa/Pfkm/Gpi1/Prkab2/Abcd2/Eno3/Pgk1/Mtap/Hacd1/Carns1	19
GO:0016053	BP	GO:0016053	organic acid biosynthetic process	19/236	363/23210	6.68006e-09	1.99337e-06	1.7983e-06	Actn3/Prkag3/Gamt/Pgam2/Gpd1/Tpi1/Cyp27a1/Glul/Prxl2b/Aldoa/Pfkm/Gpi1/Prkab2/Abcd2/Eno3/Pgk1/Mtap/Hacd1/Carns1	19
GO:0005977	BP	GO:0005977	glycogen metabolic process	10/236	78/23210	6.70952e-09	1.99337e-06	1.7983e-06	Prkag3/Phkg1/Pgm2/Slc37a4/Pygm/Pfkm/Phka1/Phkb/Ppp1r3a/Stbd1	10
GO:0006073	BP	GO:0006073	cellular glucan metabolic process	10/236	78/23210	6.70952e-09	1.99337e-06	1.7983e-06	Prkag3/Phkg1/Pgm2/Slc37a4/Pygm/Pfkm/Phka1/Phkb/Ppp1r3a/Stbd1	10
GO:0044042	BP	GO:0044042	glucan metabolic process	10/236	78/23210	6.70952e-09	1.99337e-06	1.7983e-06	Prkag3/Phkg1/Pgm2/Slc37a4/Pygm/Pfkm/Phka1/Phkb/Ppp1r3a/Stbd1	10
GO:0006936	BP	GO:0006936	muscle contraction	17/236	289/23210	7.68077e-09	1.99337e-06	1.7983e-06	Actn3/Casq1/Pgam2/Mylk2/Tmod1/Pde4b/Clcn1/Aldoa/Myom2/Mybpc2/Adora1/Slc8a1/Myh8/Myh4/Tnnt3/Myl1/Actc1	17
GO:0006165	BP	GO:0006165	nucleoside diphosphate phosphorylation	11/236	103/23210	8.3433e-09	1.99337e-06	1.7983e-06	Actn3/Prkag3/Pgam2/Gpd1/Tpi1/Ak4/Aldoa/Pfkm/Gpi1/Eno3/Pgk1	11
GO:0009127	BP	GO:0009127	purine nucleoside monophosphate biosynthetic process	13/236	158/23210	8.97576e-09	1.99337e-06	1.7983e-06	Actn3/Prkag3/Pgam2/Gpd1/Tpi1/Ak4/Ppat/Aldoa/Pfkm/Gpi1/Eno3/Pgk1/Ampd1	13
GO:0009168	BP	GO:0009168	purine ribonucleoside monophosphate biosynthetic process	13/236	158/23210	8.97576e-09	1.99337e-06	1.7983e-06	Actn3/Prkag3/Pgam2/Gpd1/Tpi1/Ak4/Ppat/Aldoa/Pfkm/Gpi1/Eno3/Pgk1/Ampd1	13
GO:0046939	BP	GO:0046939	nucleotide phosphorylation	11/236	105/23210	1.02379e-08	2.09878e-06	1.8934e-06	Actn3/Prkag3/Pgam2/Gpd1/Tpi1/Ak4/Aldoa/Pfkm/Gpi1/Eno3/Pgk1	11
GO:0009156	BP	GO:0009156	ribonucleoside monophosphate biosynthetic process	13/236	162/23210	1.21411e-08	2.31114e-06	2.08498e-06	Actn3/Prkag3/Pgam2/Gpd1/Tpi1/Ak4/Ppat/Aldoa/Pfkm/Gpi1/Eno3/Pgk1/Ampd1	13
GO:0006091	BP	GO:0006091	generation of precursor metabolites and energy	19/236	379/23210	1.34051e-08	2.38164e-06	2.14858e-06	Actn3/Prkag3/Pgam2/Gpd1/Tpi1/Phkg1/Pgm2/Ak4/Aldoa/Slc37a4/Pygm/Pfkm/Phka1/Gpi1/Phkb/Ppp1r3a/Stbd1/Eno3/Pgk1	19
GO:0009124	BP	GO:0009124	nucleoside monophosphate biosynthetic process	13/236	168/23210	1.87985e-08	3.13113e-06	2.82472e-06	Actn3/Prkag3/Pgam2/Gpd1/Tpi1/Ak4/Ppat/Aldoa/Pfkm/Gpi1/Eno3/Pgk1/Ampd1	13
GO:0006112	BP	GO:0006112	energy reserve metabolic process	10/236	88/23210	2.20247e-08	3.45269e-06	3.11482e-06	Prkag3/Phkg1/Pgm2/Slc37a4/Pygm/Pfkm/Phka1/Phkb/Ppp1r3a/Stbd1	10
GO:0042692	BP	GO:0042692	muscle cell differentiation	19/236	395/23210	2.59595e-08	3.84345e-06	3.46734e-06	Actn3/Casq1/Rarb/Popdc2/Igfbp5/Mylk2/Ppp3ca/Tmod1/Pak1/Myom2/Mybpc2/Myorg/Plpp7/Slc8a1/Tnnt3/Hacd1/Actc1/Myoz1/Sort1	19
GO:0006096	BP	GO:0006096	glycolytic process	10/236	90/23210	2.74235e-08	3.8465e-06	3.4701e-06	Actn3/Prkag3/Pgam2/Gpd1/Tpi1/Aldoa/Pfkm/Gpi1/Eno3/Pgk1	10
GO:0006757	BP	GO:0006757	ATP generation from ADP	10/236	91/23210	3.05371e-08	4.06907e-06	3.67088e-06	Actn3/Prkag3/Pgam2/Gpd1/Tpi1/Aldoa/Pfkm/Gpi1/Eno3/Pgk1	10
GO:0042866	BP	GO:0042866	pyruvate biosynthetic process	10/236	94/23210	4.18315e-08	5.30862e-06	4.78913e-06	Actn3/Prkag3/Pgam2/Gpd1/Tpi1/Aldoa/Pfkm/Gpi1/Eno3/Pgk1	10
GO:0009132	BP	GO:0009132	nucleoside diphosphate metabolic process	11/236	121/23210	4.54972e-08	5.51136e-06	4.97204e-06	Actn3/Prkag3/Pgam2/Gpd1/Tpi1/Ak4/Aldoa/Pfkm/Gpi1/Eno3/Pgk1	11
GO:0046031	BP	GO:0046031	ADP metabolic process	10/236	98/23210	6.25427e-08	7.2468e-06	6.53765e-06	Actn3/Prkag3/Pgam2/Gpd1/Tpi1/Aldoa/Pfkm/Gpi1/Eno3/Pgk1	10
GO:0006941	BP	GO:0006941	striated muscle contraction	12/236	158/23210	8.22568e-08	8.76858e-06	7.91051e-06	Actn3/Casq1/Pgam2/Mylk2/Pde4b/Aldoa/Adora1/Slc8a1/Myh8/Tnnt3/Myl1/Actc1	12
GO:0046496	BP	GO:0046496	nicotinamide nucleotide metabolic process	12/236	158/23210	8.22568e-08	8.76858e-06	7.91051e-06	Actn3/Prkag3/Pgam2/Gpd1/Tpi1/Gpd2/Aldoa/Pfkm/Gpi1/Rpia/Eno3/Pgk1	12
GO:0072330	BP	GO:0072330	monocarboxylic acid biosynthetic process	15/236	264/23210	9.42509e-08	8.95274e-06	8.07665e-06	Actn3/Prkag3/Pgam2/Gpd1/Tpi1/Cyp27a1/Prxl2b/Aldoa/Pfkm/Gpi1/Prkab2/Abcd2/Eno3/Pgk1/Hacd1	15
GO:0019362	BP	GO:0019362	pyridine nucleotide metabolic process	12/236	160/23210	9.44833e-08	8.95274e-06	8.07665e-06	Actn3/Prkag3/Pgam2/Gpd1/Tpi1/Gpd2/Aldoa/Pfkm/Gpi1/Rpia/Eno3/Pgk1	12
GO:0055002	BP	GO:0055002	striated muscle cell development	13/236	193/23210	9.71784e-08	8.95274e-06	8.07665e-06	Actn3/Casq1/Popdc2/Ppp3ca/Tmod1/Pak1/Myom2/Mybpc2/Myorg/Slc8a1/Tnnt3/Actc1/Myoz1	13
GO:0009135	BP	GO:0009135	purine nucleoside diphosphate metabolic process	10/236	103/23210	1.00781e-07	8.95274e-06	8.07665e-06	Actn3/Prkag3/Pgam2/Gpd1/Tpi1/Aldoa/Pfkm/Gpi1/Eno3/Pgk1	10
GO:0009179	BP	GO:0009179	purine ribonucleoside diphosphate metabolic process	10/236	103/23210	1.00781e-07	8.95274e-06	8.07665e-06	Actn3/Prkag3/Pgam2/Gpd1/Tpi1/Aldoa/Pfkm/Gpi1/Eno3/Pgk1	10
GO:0044264	BP	GO:0044264	cellular polysaccharide metabolic process	10/236	104/23210	1.10519e-07	9.50107e-06	8.57132e-06	Prkag3/Phkg1/Pgm2/Slc37a4/Pygm/Pfkm/Phka1/Phkb/Ppp1r3a/Stbd1	10
GO:0072524	BP	GO:0072524	pyridine-containing compound metabolic process	12/236	165/23210	1.32445e-07	1.0701e-05	9.65381e-06	Actn3/Prkag3/Pgam2/Gpd1/Tpi1/Gpd2/Aldoa/Pfkm/Gpi1/Rpia/Eno3/Pgk1	12
GO:0019359	BP	GO:0019359	nicotinamide nucleotide biosynthetic process	10/236	106/23210	1.32507e-07	1.0701e-05	9.65381e-06	Actn3/Prkag3/Pgam2/Gpd1/Tpi1/Aldoa/Pfkm/Gpi1/Eno3/Pgk1	10
GO:0009185	BP	GO:0009185	ribonucleoside diphosphate metabolic process	10/236	107/23210	1.44879e-07	1.13559e-05	1.02447e-05	Actn3/Prkag3/Pgam2/Gpd1/Tpi1/Aldoa/Pfkm/Gpi1/Eno3/Pgk1	10
GO:0006754	BP	GO:0006754	ATP biosynthetic process	11/236	137/23210	1.63613e-07	1.2458e-05	1.12389e-05	Actn3/Prkag3/Pgam2/Gpd1/Tpi1/Ak4/Aldoa/Pfkm/Gpi1/Eno3/Pgk1	11
GO:0019363	BP	GO:0019363	pyridine nucleotide biosynthetic process	10/236	109/23210	1.72702e-07	1.27847e-05	1.15337e-05	Actn3/Prkag3/Pgam2/Gpd1/Tpi1/Aldoa/Pfkm/Gpi1/Eno3/Pgk1	10
GO:0055001	BP	GO:0055001	muscle cell development	13/236	207/23210	2.19245e-07	1.57916e-05	1.42463e-05	Actn3/Casq1/Popdc2/Ppp3ca/Tmod1/Pak1/Myom2/Mybpc2/Myorg/Slc8a1/Tnnt3/Actc1/Myoz1	13
GO:0072525	BP	GO:0072525	pyridine-containing compound biosynthetic process	10/236	113/23210	2.42751e-07	1.70245e-05	1.53586e-05	Actn3/Prkag3/Pgam2/Gpd1/Tpi1/Aldoa/Pfkm/Gpi1/Eno3/Pgk1	10
GO:0006733	BP	GO:0006733	oxidoreduction coenzyme metabolic process	12/236	177/23210	2.84266e-07	1.90759e-05	1.72092e-05	Actn3/Prkag3/Pgam2/Gpd1/Tpi1/Gpd2/Aldoa/Pfkm/Gpi1/Rpia/Eno3/Pgk1	12
GO:0005976	BP	GO:0005976	polysaccharide metabolic process	10/236	115/23210	2.86317e-07	1.90759e-05	1.72092e-05	Prkag3/Phkg1/Pgm2/Slc37a4/Pygm/Pfkm/Phka1/Phkb/Ppp1r3a/Stbd1	10
GO:0009206	BP	GO:0009206	purine ribonucleoside triphosphate biosynthetic process	11/236	147/23210	3.34369e-07	2.1734e-05	1.96071e-05	Actn3/Prkag3/Pgam2/Gpd1/Tpi1/Ak4/Aldoa/Pfkm/Gpi1/Eno3/Pgk1	11
GO:0009145	BP	GO:0009145	purine nucleoside triphosphate biosynthetic process	11/236	148/23210	3.58017e-07	2.25918e-05	2.0381e-05	Actn3/Prkag3/Pgam2/Gpd1/Tpi1/Ak4/Aldoa/Pfkm/Gpi1/Eno3/Pgk1	11
GO:0006090	BP	GO:0006090	pyruvate metabolic process	10/236	118/23210	3.6452e-07	2.25918e-05	2.0381e-05	Actn3/Prkag3/Pgam2/Gpd1/Tpi1/Aldoa/Pfkm/Gpi1/Eno3/Pgk1	10
GO:0009201	BP	GO:0009201	ribonucleoside triphosphate biosynthetic process	11/236	150/23210	4.0979e-07	2.44132e-05	2.20242e-05	Actn3/Prkag3/Pgam2/Gpd1/Tpi1/Ak4/Aldoa/Pfkm/Gpi1/Eno3/Pgk1	11
GO:0060537	BP	GO:0060537	muscle tissue development	19/236	472/23210	4.12231e-07	2.44132e-05	2.20242e-05	Actn3/Rbfox1/Rarb/Popdc2/Mstn/Col19a1/Igfbp5/Mylk2/Ppp3ca/Sema3c/Mylpf/Pak1/Tsc22d3/Myom2/Mybpc2/Myorg/Slc8a1/Actc1/Myoz1	19
GO:0015629	CC	GO:0015629	actin cytoskeleton	19/240	490/23436	8.09755e-07	3.87525e-05	3.22684e-05	Pvalb/Actn3/Capza2/Pgm2/Tmod1/Mylpf/Aldoa/Pak1/Myom2/Cib2/Mybpc2/Mybph/Myh8/Myh4/Sept11/Tnnt3/Myl1/Actc1/Myoz1	19
GO:0009142	BP	GO:0009142	nucleoside triphosphate biosynthetic process	11/236	160/23210	7.81062e-07	4.52507e-05	4.08226e-05	Actn3/Prkag3/Pgam2/Gpd1/Tpi1/Ak4/Aldoa/Pfkm/Gpi1/Eno3/Pgk1	11
GO:0009167	BP	GO:0009167	purine ribonucleoside monophosphate metabolic process	14/236	272/23210	8.37969e-07	4.75146e-05	4.2865e-05	Actn3/Prkag3/Pgam2/Gpd1/Tpi1/Ak4/Ppat/Aldoa/Pfkm/Gpi1/Myh8/Eno3/Pgk1/Ampd1	14
GO:0009126	BP	GO:0009126	purine nucleoside monophosphate metabolic process	14/236	273/23210	8.75388e-07	4.84457e-05	4.37049e-05	Actn3/Prkag3/Pgam2/Gpd1/Tpi1/Ak4/Ppat/Aldoa/Pfkm/Gpi1/Myh8/Eno3/Pgk1/Ampd1	14
GO:0014706	BP	GO:0014706	striated muscle tissue development	18/236	449/23210	8.90746e-07	4.84457e-05	4.37049e-05	Actn3/Rbfox1/Rarb/Popdc2/Mstn/Col19a1/Mylk2/Ppp3ca/Sema3c/Mylpf/Pak1/Tsc22d3/Myom2/Mybpc2/Myorg/Slc8a1/Actc1/Myoz1	18
GO:0009161	BP	GO:0009161	ribonucleoside monophosphate metabolic process	14/236	276/23210	9.96799e-07	5.31294e-05	4.79303e-05	Actn3/Prkag3/Pgam2/Gpd1/Tpi1/Ak4/Ppat/Aldoa/Pfkm/Gpi1/Myh8/Eno3/Pgk1/Ampd1	14
GO:0009166	BP	GO:0009166	nucleotide catabolic process	10/236	136/23210	1.35574e-06	7.0844e-05	6.39114e-05	Actn3/Prkag3/Pgam2/Gpd1/Tpi1/Aldoa/Pfkm/Gpi1/Eno3/Pgk1	10
GO:0060538	BP	GO:0060538	skeletal muscle organ development	12/236	206/23210	1.43173e-06	7.32083e-05	6.60443e-05	Actn3/Rbfox1/Popdc2/Mstn/Col19a1/Mylk2/Ppp3ca/Cntfr/Mylpf/Tsc22d3/Myorg/Myoz1	12
GO:0009123	BP	GO:0009123	nucleoside monophosphate metabolic process	14/236	285/23210	1.45671e-06	7.32083e-05	6.60443e-05	Actn3/Prkag3/Pgam2/Gpd1/Tpi1/Ak4/Ppat/Aldoa/Pfkm/Gpi1/Myh8/Eno3/Pgk1/Ampd1	14
GO:0072522	BP	GO:0072522	purine-containing compound biosynthetic process	13/236	245/23210	1.48339e-06	7.32083e-05	6.60443e-05	Actn3/Prkag3/Pgam2/Gpd1/Tpi1/Ak4/Aldoa/Pfkm/Gpi1/Eno3/Pgk1/Mtap/Ampd1	13
GO:0034404	BP	GO:0034404	nucleobase-containing small molecule biosynthetic process	11/236	172/23210	1.5949e-06	7.72799e-05	6.97175e-05	Actn3/Prkag3/Pgam2/Gpd1/Tpi1/Aldoa/Pfkm/Gpi1/Eno3/Pgk1/Mtap	11
GO:0007517	BP	GO:0007517	muscle organ development	17/236	424/23210	1.80322e-06	8.58137e-05	7.74162e-05	Actn3/Rbfox1/Popdc2/Mstn/Col19a1/Mylk2/Ppp3ca/Cntfr/Mylpf/Pak1/Tsc22d3/Myom2/Ky/Mybpc2/Myorg/Actc1/Myoz1	17
GO:1901293	BP	GO:1901293	nucleoside phosphate biosynthetic process	14/236	291/23210	1.86064e-06	8.69932e-05	7.84803e-05	Actn3/Prkag3/Pgam2/Gpd1/Tpi1/Ak4/Ppat/Aldoa/Rrm1/Pfkm/Gpi1/Eno3/Pgk1/Ampd1	14
GO:1901292	BP	GO:1901292	nucleoside phosphate catabolic process	10/236	148/23210	2.92082e-06	0.000134207	0.000121074	Actn3/Prkag3/Pgam2/Gpd1/Tpi1/Aldoa/Pfkm/Gpi1/Eno3/Pgk1	10
GO:0009152	BP	GO:0009152	purine ribonucleotide biosynthetic process	12/236	223/23210	3.26811e-06	0.000147619	0.000133173	Actn3/Prkag3/Pgam2/Gpd1/Tpi1/Ak4/Aldoa/Pfkm/Gpi1/Eno3/Pgk1/Ampd1	12
GO:0009260	BP	GO:0009260	ribonucleotide biosynthetic process	12/236	232/23210	4.90709e-06	0.000217956	0.000196628	Actn3/Prkag3/Pgam2/Gpd1/Tpi1/Ak4/Aldoa/Pfkm/Gpi1/Eno3/Pgk1/Ampd1	12
GO:0007519	BP	GO:0007519	skeletal muscle tissue development	11/236	197/23210	5.92837e-06	0.000259002	0.000233657	Actn3/Rbfox1/Popdc2/Mstn/Col19a1/Mylk2/Ppp3ca/Mylpf/Tsc22d3/Myorg/Myoz1	11
GO:0046390	BP	GO:0046390	ribose phosphate biosynthetic process	12/236	239/23210	6.64354e-06	0.000281032	0.000253531	Actn3/Prkag3/Pgam2/Gpd1/Tpi1/Ak4/Aldoa/Pfkm/Gpi1/Eno3/Pgk1/Ampd1	12
GO:0090257	BP	GO:0090257	regulation of muscle system process	12/236	239/23210	6.64354e-06	0.000281032	0.000253531	Actn3/Prkag3/Casq1/Mstn/Igfbp5/Mylk2/Ppp3ca/Pde4b/Pak1/Adora1/Slc8a1/Tnnt3	12
GO:0006164	BP	GO:0006164	purine nucleotide biosynthetic process	12/236	240/23210	6.93118e-06	0.000288619	0.000260375	Actn3/Prkag3/Pgam2/Gpd1/Tpi1/Ak4/Aldoa/Pfkm/Gpi1/Eno3/Pgk1/Ampd1	12
GO:0009165	BP	GO:0009165	nucleotide biosynthetic process	13/236	285/23210	7.76073e-06	0.00031819	0.000287053	Actn3/Prkag3/Pgam2/Gpd1/Tpi1/Ak4/Aldoa/Rrm1/Pfkm/Gpi1/Eno3/Pgk1/Ampd1	13
GO:0006732	BP	GO:0006732	coenzyme metabolic process	14/236	331/23210	8.20625e-06	0.000331359	0.000298933	Actn3/Prkag3/Gamt/Aldh1l2/Pgam2/Gpd1/Tpi1/Gpd2/Aldoa/Pfkm/Gpi1/Rpia/Eno3/Pgk1	14
GO:0030239	BP	GO:0030239	myofibril assembly	7/236	72/23210	8.63515e-06	0.000343473	0.000309861	Casq1/Tmod1/Myom2/Mybpc2/Tnnt3/Actc1/Myoz1	7
GO:0046034	BP	GO:0046034	ATP metabolic process	12/236	247/23210	9.26945e-06	0.000363281	0.000327731	Actn3/Prkag3/Pgam2/Gpd1/Tpi1/Ak4/Aldoa/Pfkm/Gpi1/Myh8/Eno3/Pgk1	12
GO:0006734	BP	GO:0006734	NADH metabolic process	5/236	29/23210	1.01364e-05	0.000391499	0.000353188	Actn3/Gpd1/Gpd2/Pfkm/Gpi1	5
GO:0046434	BP	GO:0046434	organophosphate catabolic process	11/236	210/23210	1.08614e-05	0.000413509	0.000373044	Actn3/Prkag3/Pgam2/Gpd1/Tpi1/Gpd2/Aldoa/Pfkm/Gpi1/Eno3/Pgk1	11
GO:0005996	BP	GO:0005996	monosaccharide metabolic process	12/236	253/23210	1.1797e-05	0.000442804	0.000399472	Actn3/Pgam2/Gpd1/Tpi1/Pfkfb4/Pgm2/Gpd2/Aldoa/Pfkm/Gpi1/Rpia/Pgk1	12
GO:0015980	BP	GO:0015980	energy derivation by oxidation of organic compounds	12/236	254/23210	1.22722e-05	0.000454243	0.000409792	Actn3/Prkag3/Gpd1/Phkg1/Pgm2/Slc37a4/Pygm/Pfkm/Phka1/Phkb/Ppp1r3a/Stbd1	12
GO:0005865	CC	GO:0005865	striated muscle thin filament	5/240	30/23436	1.24896e-05	0.000523004	0.000435494	Actn3/Tmod1/Myom2/Mybpc2/Tnnt3	5
GO:0008076	CC	GO:0008076	voltage-gated potassium channel complex	7/240	77/23436	1.41482e-05	0.000526628	0.000438512	Calm3/Kcnab1/Kcnc4/Lrrc38/Calm2/Cntnap2/Kcns1	7
GO:0036379	CC	GO:0036379	myofilament	5/240	32/23436	1.7357e-05	0.000581458	0.000484168	Actn3/Tmod1/Myom2/Mybpc2/Tnnt3	5
GO:1902495	CC	GO:1902495	transmembrane transporter complex	13/240	308/23436	1.91194e-05	0.000582273	0.000484847	Calm3/Kcnab1/Kcnc4/Pde4b/Lrrc38/Gabrd/Clcn1/Ttyh2/Calm2/Cntnap2/Kcns1/Atp1b2/Cacna2d4	13
GO:0032982	CC	GO:0032982	myosin filament	4/240	17/23436	2.29878e-05	0.000623189	0.000518917	Mybpc2/Mybph/Myh8/Myh4	4
GO:1990351	CC	GO:1990351	transporter complex	13/240	315/23436	2.41835e-05	0.000623189	0.000518917	Calm3/Kcnab1/Kcnc4/Pde4b/Lrrc38/Gabrd/Clcn1/Ttyh2/Calm2/Cntnap2/Kcns1/Atp1b2/Cacna2d4	13
GO:0019318	BP	GO:0019318	hexose metabolic process	11/236	223/23210	1.90371e-05	0.000694983	0.000626974	Actn3/Pgam2/Gpd1/Tpi1/Pfkfb4/Pgm2/Gpd2/Aldoa/Pfkm/Gpi1/Pgk1	11
GO:0034705	CC	GO:0034705	potassium channel complex	7/240	88/23436	3.39528e-05	0.00076303	0.000635359	Calm3/Kcnab1/Kcnc4/Lrrc38/Calm2/Cntnap2/Kcns1	7
GO:0016459	CC	GO:0016459	myosin complex	6/240	60/23436	3.41655e-05	0.00076303	0.000635359	Mylpf/Mybpc2/Mybph/Myh8/Myh4/Myl1	6
GO:0006942	BP	GO:0006942	regulation of striated muscle contraction	7/236	83/23210	2.21394e-05	0.000797316	0.000719293	Actn3/Casq1/Mylk2/Pde4b/Adora1/Slc8a1/Tnnt3	7
GO:0009205	BP	GO:0009205	purine ribonucleoside triphosphate metabolic process	12/236	272/23210	2.42024e-05	0.000859992	0.000775836	Actn3/Prkag3/Pgam2/Gpd1/Tpi1/Ak4/Aldoa/Pfkm/Gpi1/Myh8/Eno3/Pgk1	12
GO:0009199	BP	GO:0009199	ribonucleoside triphosphate metabolic process	12/236	276/23210	2.7929e-05	0.000979353	0.000883516	Actn3/Prkag3/Pgam2/Gpd1/Tpi1/Ak4/Aldoa/Pfkm/Gpi1/Myh8/Eno3/Pgk1	12
GO:0009108	BP	GO:0009108	coenzyme biosynthetic process	10/236	194/23210	3.1406e-05	0.00107304	0.000968032	Actn3/Prkag3/Pgam2/Gpd1/Tpi1/Aldoa/Pfkm/Gpi1/Eno3/Pgk1	10
GO:0016051	BP	GO:0016051	carbohydrate biosynthetic process	10/236	194/23210	3.1406e-05	0.00107304	0.000968032	Prkag3/Pgam2/Gpd1/Tpi1/Phkg1/Pgm2/Gpd2/Nans/Gpi1/Pgk1	10
GO:0034702	CC	GO:0034702	ion channel complex	12/240	293/23436	5.35311e-05	0.00112081	0.000933272	Calm3/Kcnab1/Kcnc4/Pde4b/Lrrc38/Gabrd/Clcn1/Ttyh2/Calm2/Cntnap2/Kcns1/Cacna2d4	12
GO:0009144	BP	GO:0009144	purine nucleoside triphosphate metabolic process	12/236	281/23210	3.32817e-05	0.00112273	0.00101286	Actn3/Prkag3/Pgam2/Gpd1/Tpi1/Ak4/Aldoa/Pfkm/Gpi1/Myh8/Eno3/Pgk1	12
GO:0044262	BP	GO:0044262	cellular carbohydrate metabolic process	12/236	284/23210	3.69036e-05	0.00122935	0.00110905	Actn3/Prkag3/Tpi1/Phkg1/Pgm2/Slc37a4/Pygm/Pfkm/Phka1/Phkb/Ppp1r3a/Stbd1	12
GO:0003009	BP	GO:0003009	skeletal muscle contraction	5/236	40/23210	5.12753e-05	0.00168702	0.00152193	Actn3/Casq1/Mylk2/Myh8/Tnnt3	5
GO:0009141	BP	GO:0009141	nucleoside triphosphate metabolic process	12/236	298/23210	5.87016e-05	0.0019078	0.00172111	Actn3/Prkag3/Pgam2/Gpd1/Tpi1/Ak4/Aldoa/Pfkm/Gpi1/Myh8/Eno3/Pgk1	12
GO:0019693	BP	GO:0019693	ribose phosphate metabolic process	15/236	450/23210	6.27837e-05	0.00201589	0.00181862	Actn3/Prkag3/Pgam2/Gpd1/Tpi1/Ak4/Ppat/Aldoa/Pfkm/Gpi1/Rpia/Myh8/Eno3/Pgk1/Ampd1	15
GO:0001780	BP	GO:0001780	neutrophil homeostasis	4/236	22/23210	6.60035e-05	0.00209404	0.00188912	Cxcr2/Pde4b/Slc37a4/Pik3cd	4
GO:0043501	BP	GO:0043501	skeletal muscle adaptation	4/236	23/23210	7.92634e-05	0.00248514	0.00224195	Actn3/Igfbp5/Ppp3ca/Myoz1	4
GO:0006094	BP	GO:0006094	gluconeogenesis	6/236	73/23210	9.99685e-05	0.00309786	0.00279471	Pgam2/Gpd1/Tpi1/Gpd2/Gpi1/Pgk1	6
GO:0019674	BP	GO:0019674	NAD metabolic process	5/236	46/23210	0.000101649	0.00311372	0.00280902	Actn3/Gpd1/Gpd2/Pfkm/Gpi1	5
GO:0035051	BP	GO:0035051	cardiocyte differentiation	9/236	182/23210	0.00010745	0.00325402	0.00293559	Rarb/Popdc2/Mylk2/Sema3c/Pak1/Myom2/Mybpc2/Slc8a1/Actc1	9
GO:0055007	BP	GO:0055007	cardiac muscle cell differentiation	8/236	143/23210	0.000111	0.00329987	0.00297695	Rarb/Popdc2/Mylk2/Pak1/Myom2/Mybpc2/Slc8a1/Actc1	8
GO:0019320	BP	GO:0019320	hexose catabolic process	4/236	25/23210	0.00011144	0.00329987	0.00297695	Actn3/Pgm2/Pfkm/Gpi1	4
GO:0019319	BP	GO:0019319	hexose biosynthetic process	6/236	76/23210	0.000125173	0.00366579	0.00330707	Pgam2/Gpd1/Tpi1/Gpd2/Gpi1/Pgk1	6
GO:0033267	CC	GO:0033267	axon part	14/240	448/23436	0.000231639	0.00456465	0.00380089	Calm3/Cpeb1/Glul/Itga4/Tpx2/Mylk2/Aurka/Kcnab1/Kcnc4/Pak1/Calm2/Ankrd9/Cntnap2/Adora1	14
GO:0072521	BP	GO:0072521	purine-containing compound metabolic process	15/236	490/23210	0.00016054	0.00465043	0.00419536	Actn3/Prkag3/Gamt/Pgam2/Gpd1/Tpi1/Ak4/Aldoa/Pfkm/Gpi1/Myh8/Eno3/Pgk1/Mtap/Ampd1	15
GO:0006006	BP	GO:0006006	glucose metabolic process	9/236	194/23210	0.000174057	0.00498776	0.00449967	Actn3/Pgam2/Gpd1/Tpi1/Pgm2/Gpd2/Pfkm/Gpi1/Pgk1	9
GO:0010927	BP	GO:0010927	cellular component assembly involved in morphogenesis	7/236	116/23210	0.000187298	0.00529094	0.00477318	Casq1/Tmod1/Myom2/Mybpc2/Tnnt3/Actc1/Myoz1	7
GO:0046364	BP	GO:0046364	monosaccharide biosynthetic process	6/236	82/23210	0.000190593	0.00529094	0.00477318	Pgam2/Gpd1/Tpi1/Gpd2/Gpi1/Pgk1	6
GO:0048747	BP	GO:0048747	muscle fiber development	6/236	82/23210	0.000190593	0.00529094	0.00477318	Actn3/Ppp3ca/Myom2/Mybpc2/Myorg/Slc8a1	6
GO:0042383	CC	GO:0042383	sarcolemma	8/240	163/23436	0.000286266	0.00532773	0.00443629	Casq1/Popdc2/Aqp4/Clcn1/Rtn2/Cib2/Stbd1/Slc8a1	8
GO:0045214	BP	GO:0045214	sarcomere organization	5/236	53/23210	0.000200858	0.00551126	0.00497195	Casq1/Myom2/Mybpc2/Tnnt3/Myoz1	5
GO:0046365	BP	GO:0046365	monosaccharide catabolic process	4/236	29/23210	0.000202666	0.00551126	0.00497195	Actn3/Pgm2/Pfkm/Gpi1	4
GO:0033275	BP	GO:0033275	actin-myosin filament sliding	3/236	12/23210	0.000213384	0.00574412	0.00518202	Mylk2/Myh8/Actc1	3
GO:0031032	BP	GO:0031032	actomyosin structure organization	9/236	204/23210	0.00025309	0.00674485	0.00608482	Casq1/Pfn1/Tmod1/Pak1/Myom2/Mybpc2/Tnnt3/Actc1/Myoz1	9
GO:0051188	BP	GO:0051188	cofactor biosynthetic process	10/236	251/23210	0.000263831	0.00690404	0.00622843	Actn3/Prkag3/Pgam2/Gpd1/Tpi1/Aldoa/Pfkm/Gpi1/Eno3/Pgk1	10
GO:0090075	BP	GO:0090075	relaxation of muscle	4/236	31/23210	0.000264245	0.00690404	0.00622843	Actn3/Pde4b/Adora1/Slc8a1	4
GO:0030240	BP	GO:0030240	skeletal muscle thin filament assembly	3/236	13/23210	0.000275319	0.00705505	0.00636466	Myom2/Mybpc2/Actc1	3
GO:0061615	BP	GO:0061615	glycolytic process through fructose-6-phosphate	3/236	13/23210	0.000275319	0.00705505	0.00636466	Aldoa/Pfkm/Gpi1	3
GO:0050879	BP	GO:0050879	multicellular organismal movement	5/236	57/23210	0.000283564	0.00712922	0.00643158	Actn3/Casq1/Mylk2/Myh8/Tnnt3	5
GO:0050881	BP	GO:0050881	musculoskeletal movement	5/236	57/23210	0.000283564	0.00712922	0.00643158	Actn3/Casq1/Mylk2/Myh8/Tnnt3	5
GO:0034703	CC	GO:0034703	cation channel complex	9/240	219/23436	0.000448654	0.00791048	0.00658689	Calm3/Kcnab1/Kcnc4/Pde4b/Lrrc38/Calm2/Cntnap2/Kcns1/Cacna2d4	9
GO:0006007	BP	GO:0006007	glucose catabolic process	3/236	14/23210	0.00034778	0.00850306	0.00767098	Actn3/Pfkm/Gpi1	3
GO:0014819	BP	GO:0014819	regulation of skeletal muscle contraction	3/236	14/23210	0.00034778	0.00850306	0.00767098	Actn3/Casq1/Mylk2	3
GO:0014866	BP	GO:0014866	skeletal myofibril assembly	3/236	14/23210	0.00034778	0.00850306	0.00767098	Myom2/Mybpc2/Actc1	3
GO:0044275	BP	GO:0044275	cellular carbohydrate catabolic process	4/236	34/23210	0.000380277	0.00921308	0.00831151	Tpi1/Pygm/Pfkm/Stbd1	4
GO:0009150	BP	GO:0009150	purine ribonucleotide metabolic process	13/236	423/23210	0.000421608	0.0101224	0.00913183	Actn3/Prkag3/Pgam2/Gpd1/Tpi1/Ak4/Aldoa/Pfkm/Gpi1/Myh8/Eno3/Pgk1/Ampd1	13
GO:1902911	CC	GO:1902911	protein kinase complex	6/240	101/23436	0.000610432	0.0102247	0.00851392	Acvr1b/Prkag3/Phkg1/Phka1/Phkb/Prkab2	6
GO:0030315	CC	GO:0030315	T-tubule	5/240	70/23436	0.000760693	0.0121349	0.0101044	Casq1/Aqp4/Rtn2/Stbd1/Slc8a1	5
GO:0009259	BP	GO:0009259	ribonucleotide metabolic process	13/236	433/23210	0.000524928	0.0124303	0.0112139	Actn3/Prkag3/Pgam2/Gpd1/Tpi1/Ak4/Aldoa/Pfkm/Gpi1/Myh8/Eno3/Pgk1/Ampd1	13
GO:0014733	BP	GO:0014733	regulation of skeletal muscle adaptation	3/236	16/23210	0.000527063	0.0124303	0.0112139	Actn3/Igfbp5/Ppp3ca	3
GO:0055013	BP	GO:0055013	cardiac muscle cell development	6/236	100/23210	0.000557583	0.0130347	0.0117592	Popdc2/Pak1/Myom2/Mybpc2/Slc8a1/Actc1	6
GO:0006163	BP	GO:0006163	purine nucleotide metabolic process	13/236	447/23210	0.000705051	0.0163388	0.0147399	Actn3/Prkag3/Pgam2/Gpd1/Tpi1/Ak4/Aldoa/Pfkm/Gpi1/Myh8/Eno3/Pgk1/Ampd1	13
GO:0005980	BP	GO:0005980	glycogen catabolic process	3/236	18/23210	0.000756557	0.0171352	0.0154584	Pygm/Pfkm/Stbd1	3
GO:0009251	BP	GO:0009251	glucan catabolic process	3/236	18/23210	0.000756557	0.0171352	0.0154584	Pygm/Pfkm/Stbd1	3
GO:0055006	BP	GO:0055006	cardiac cell development	6/236	106/23210	0.000758705	0.0171352	0.0154584	Popdc2/Pak1/Myom2/Mybpc2/Slc8a1/Actc1	6
GO:0010880	BP	GO:0010880	regulation of release of sequestered calcium ion into cytosol by sarcoplasmic reticulum	3/236	19/23210	0.000891695	0.0198031	0.0178652	Casq1/Dhrs7c/Slc8a1	3
GO:0046184	BP	GO:0046184	aldehyde biosynthetic process	3/236	19/23210	0.000891695	0.0198031	0.0178652	Tpi1/Aldoa/Gpi1	3
GO:0001776	BP	GO:0001776	leukocyte homeostasis	6/236	110/23210	0.000921136	0.0202878	0.0183025	Stat5b/Cxcr2/Pde4b/Tsc22d3/Slc37a4/Pik3cd	6
GO:0044270	BP	GO:0044270	cellular nitrogen compound catabolic process	13/236	463/23210	0.000972142	0.0212357	0.0191577	Actn3/Prkag3/Dazl/Dnase1l1/Aldh1l2/Pgam2/Gpd1/Tpi1/Aldoa/Pfkm/Gpi1/Eno3/Pgk1	13
GO:0006937	BP	GO:0006937	regulation of muscle contraction	7/236	154/23210	0.00103044	0.0223261	0.0201414	Actn3/Casq1/Mylk2/Pde4b/Adora1/Slc8a1/Tnnt3	7
GO:0044247	BP	GO:0044247	cellular polysaccharide catabolic process	3/236	20/23210	0.00104121	0.0223777	0.0201879	Pygm/Pfkm/Stbd1	3
GO:0005581	CC	GO:0005581	collagen trimer	5/240	81/23436	0.00147044	0.0223908	0.0186444	Col19a1/Col9a1/Col24a1/Emid1/Col6a6	5
GO:0046700	BP	GO:0046700	heterocycle catabolic process	13/236	469/23210	0.00109206	0.0232826	0.0210043	Actn3/Prkag3/Dazl/Dnase1l1/Aldh1l2/Pgam2/Gpd1/Tpi1/Aldoa/Pfkm/Gpi1/Eno3/Pgk1	13
GO:0014808	BP	GO:0014808	release of sequestered calcium ion into cytosol by sarcoplasmic reticulum	3/236	21/23210	0.00120568	0.0253002	0.0228244	Casq1/Dhrs7c/Slc8a1	3
GO:0046716	BP	GO:0046716	muscle cell cellular homeostasis	3/236	21/23210	0.00120568	0.0253002	0.0228244	Mstn/Aldoa/Pfkm	3
GO:0045926	BP	GO:0045926	negative regulation of growth	9/236	258/23210	0.00135933	0.0283017	0.0255322	Acvr1b/Mstn/Igfbp5/Sema6d/Epha7/Sema3c/Pak1/St7l/Myoz1	9
GO:1903514	BP	GO:1903514	release of sequestered calcium ion into cytosol by endoplasmic reticulum	3/236	22/23210	0.00138562	0.028541	0.0257481	Casq1/Dhrs7c/Slc8a1	3
GO:0019722	BP	GO:0019722	calcium-mediated signaling	8/236	209/23210	0.00139224	0.028541	0.0257481	Actn3/Casq1/Calm3/Cxcr2/Ppp3ca/Ccrl2/Slc8a1/Myoz1	8
GO:0019439	BP	GO:0019439	aromatic compound catabolic process	13/236	483/23210	0.00142066	0.0289012	0.026073	Actn3/Prkag3/Dazl/Dnase1l1/Aldh1l2/Pgam2/Gpd1/Tpi1/Aldoa/Pfkm/Gpi1/Eno3/Pgk1	13
GO:0034655	BP	GO:0034655	nucleobase-containing compound catabolic process	12/236	425/23210	0.0014426	0.0291253	0.0262752	Actn3/Prkag3/Dazl/Dnase1l1/Pgam2/Gpd1/Tpi1/Aldoa/Pfkm/Gpi1/Eno3/Pgk1	12
GO:0014888	BP	GO:0014888	striated muscle adaptation	4/236	49/23210	0.00154235	0.030905	0.0278807	Actn3/Igfbp5/Ppp3ca/Myoz1	4
GO:0000272	BP	GO:0000272	polysaccharide catabolic process	3/236	23/23210	0.00158158	0.0314545	0.0283765	Pygm/Pfkm/Stbd1	3
GO:0044325	MF	GO:0044325	ion channel binding	8/228	136/22710	7.13606e-05	0.0328259	0.0280935	Calm3/Kcnab1/Pde4b/Lrrc38/Calm2/Ankrd9/Cntnap2/Slc8a1	8
GO:0005876	CC	GO:0005876	spindle microtubule	4/240	54/23436	0.00227105	0.0330783	0.0275436	Arl3/Tpx2/Aurka/Capn6	4
GO:0004683	MF	GO:0004683	calmodulin-dependent protein kinase activity	4/228	27/22710	0.000144841	0.0333134	0.0285107	Phkg1/Mapkapk3/Phka1/Phkb	4
GO:0014902	BP	GO:0014902	myotube differentiation	6/236	124/23210	0.00170782	0.0334657	0.0301908	Actn3/Ppp3ca/Myorg/Plpp7/Hacd1/Sort1	6
GO:0060048	BP	GO:0060048	cardiac muscle contraction	6/236	124/23210	0.00170782	0.0334657	0.0301908	Pde4b/Adora1/Slc8a1/Tnnt3/Myl1/Actc1	6
GO:0048640	BP	GO:0048640	negative regulation of developmental growth	6/236	127/23210	0.00192801	0.0375047	0.0338346	Mstn/Sema6d/Epha7/Sema3c/Pak1/Myoz1	6
GO:0070252	BP	GO:0070252	actin-mediated cell contraction	5/236	87/23210	0.0019561	0.0377755	0.0340789	Mylk2/Pde4b/Adora1/Myh8/Actc1	5
GO:0002262	BP	GO:0002262	myeloid cell homeostasis	7/236	176/23210	0.00221449	0.0424576	0.0383028	Acvr1b/Stat5b/Cxcr2/Pde4b/Slc37a4/Gpi1/Pik3cd	7
GO:0055003	BP	GO:0055003	cardiac myofibril assembly	3/236	26/23210	0.00227038	0.0432182	0.038989	Myom2/Mybpc2/Actc1	3
GO:0097431	CC	GO:0097431	mitotic spindle pole	3/240	29/23436	0.00318348	0.0444361	0.037001	Aurka/Fam83d/Eml1	3
GO:0046683	BP	GO:0046683	response to organophosphorus	5/236	91/23210	0.00238271	0.0450349	0.0406279	Gpd1/Igfbp5/Pygm/Cib2/Slc8a1	5
GO:0050900	BP	GO:0050900	leukocyte migration	10/236	340/23210	0.00263993	0.0495451	0.0446967	Stat5b/Pla2g7/Mstn/Cxcr2/Itga4/Pde4b/Padi2/Slc37a4/Adora1/Tafa4	10

## Sheet: REViGO_BP
term_ID	description	frequency	plot_X	plot_Y	plot_size	log10 p-value	uniqueness	dispensability	representative	eliminated
GO:0001780	neutrophil homeostasis	0.00076	1.814	-5.836	1.23	-2.679	0.939	0	1780	0
GO:0002262	myeloid cell homeostasis	0.00722	null	null	2.185	-1.372	0.932	0.828	1780	1
GO:0001776	leukocyte homeostasis	0.00503	null	null	2.029	-1.6928	0.933	0.678	1780	1
GO:0003012	muscle system process	0.01643	6.693	-1.353	2.54	-6.5394	0.909	0	3012	0
GO:0016052	carbohydrate catabolic process	0.00556	-6.745	0.188	2.072	-6.5377	0.694	0	16052	0
GO:0046364	monosaccharide biosynthetic process	0.00375	null	null	1.903	-2.2765	0.482	0.864	16052	1
GO:0046365	monosaccharide catabolic process	0.00114	null	null	1.398	-2.2587	0.517	0.774	16052	1
GO:0009251	glucan catabolic process	0.00071	null	null	1.204	-1.7661	0.691	0.974	16052	1
GO:0006006	glucose metabolic process	0.00878	null	null	2.27	-2.3021	0.486	0.943	16052	1
GO:0016051	carbohydrate biosynthetic process	0.00836	null	null	2.248	-2.9694	0.517	0.81	16052	1
GO:0006007	glucose catabolic process	0.00038	null	null	0.954	-2.0704	0.546	0.909	16052	1
GO:0000272	polysaccharide catabolic process	0.00085	null	null	1.279	-1.5023	0.694	0.84	16052	1
GO:0006112	energy reserve metabolic process	0.00427	null	null	1.959	-5.4618	0.681	0.796	16052	1
GO:0006094	gluconeogenesis	0.00337	null	null	1.857	-2.5089	0.484	0.855	16052	1
GO:0044247	cellular polysaccharide catabolic process	0.00071	null	null	1.204	-1.6502	0.681	0.974	16052	1
GO:0044275	cellular carbohydrate catabolic process	0.00133	null	null	1.462	-2.0356	0.684	0.71	16052	1
GO:0006073	cellular glucan metabolic process	0.00347	null	null	1.869	-5.7004	0.698	0.997	16052	1
GO:0044264	cellular polysaccharide metabolic process	0.00408	null	null	1.94	-5.0222	0.696	0.957	16052	1
GO:0044262	cellular carbohydrate metabolic process	0.01206	null	null	2.407	-2.9103	0.698	0.793	16052	1
GO:0044042	glucan metabolic process	0.00347	null	null	1.869	-5.7004	0.712	0.944	16052	1
GO:0005996	monosaccharide metabolic process	0.01178	null	null	2.396	-3.3538	0.483	0.841	16052	1
GO:0005980	glycogen catabolic process	0.00071	null	null	1.204	-1.7661	0.557	0.874	16052	1
GO:0005977	glycogen metabolic process	0.00347	null	null	1.869	-5.7004	0.553	0.657	16052	1
GO:0019318	hexose metabolic process	0.01035	null	null	2.34	-3.158	0.48	0.741	16052	1
GO:0005976	polysaccharide metabolic process	0.00465	null	null	1.996	-4.7195	0.731	0.675	16052	1
GO:0019320	hexose catabolic process	0.0009	null	null	1.301	-2.4815	0.521	0.758	16052	1
GO:0019319	hexose biosynthetic process	0.00351	null	null	1.875	-2.4358	0.483	0.981	16052	1
GO:0015980	energy derivation by oxidation of organic compounds	0.0114	null	null	2.382	-3.3427	0.655	0.831	16052	1
GO:0051146	striated muscle cell differentiation	0.01263	3.986	5.651	2.427	-6.2193	0.74	0	51146	0
GO:0055013	cardiac muscle cell development	0.00304	null	null	1.813	-1.8849	0.705	0.896	51146	1
GO:0055006	cardiac cell development	0.00337	null	null	1.857	-1.7661	0.785	0.905	51146	1
GO:0055007	cardiac muscle cell differentiation	0.00532	null	null	2.053	-2.4815	0.7	0.847	51146	1
GO:0055001	muscle cell development	0.00788	null	null	2.223	-4.8016	0.748	0.844	51146	1
GO:0055002	striated muscle cell development	0.00708	null	null	2.176	-5.048	0.735	0.834	51146	1
GO:0055003	cardiac myofibril assembly	0.00076	null	null	1.23	-1.3643	0.708	0.874	51146	1
GO:0014902	myotube differentiation	0.00518	null	null	2.041	-1.4754	0.75	0.845	51146	1
GO:0060538	skeletal muscle organ development	0.00883	null	null	2.272	-4.1354	0.777	0.755	51146	1
GO:0030240	skeletal muscle thin filament assembly	0.00024	null	null	0.778	-2.1515	0.767	0.713	51146	1
GO:0030239	myofibril assembly	0.0029	null	null	1.792	-3.4641	0.726	0.89	51146	1
GO:0007517	muscle organ development	0.01724	null	null	2.561	-4.0664	0.765	0.856	51146	1
GO:0014866	skeletal myofibril assembly	0.00033	null	null	0.903	-2.0704	0.762	0.628	51146	1
GO:0045214	sarcomere organization	0.00214	null	null	1.663	-2.2587	0.73	0.866	51146	1
GO:0048747	muscle fiber development	0.00294	null	null	1.799	-2.2765	0.751	0.892	51146	1
GO:0042692	muscle cell differentiation	0.01899	null	null	2.603	-5.4153	0.743	0.824	51146	1
GO:0045926	negative regulation of growth	0.01049	-1.388	-0.366	2.346	-1.5482	0.963	0.04	45926	0
GO:0048640	negative regulation of developmental growth	0.00394	null	null	1.924	-1.4259	0.889	0.68	45926	1
GO:0019722	calcium-mediated signaling	0.00651	-4.304	-3.309	2.14	-1.5445	0.934	0.057	19722	0
GO:0033275	actin-myosin filament sliding	0.00047	-2.378	-6.218	1.041	-2.2408	0.864	0.065	33275	0
GO:0031032	actomyosin structure organization	0.00831	null	null	2.246	-2.171	0.842	0.539	33275	1
GO:0070252	actin-mediated cell contraction	0.00351	null	null	1.875	-1.4228	0.846	0.813	33275	1
GO:0009168	purine ribonucleoside monophosphate biosynthetic process	0.00309	-3.238	5.499	1.82	-5.7004	0.439	0.077	9168	0
GO:1901292	nucleoside phosphate catabolic process	0.00294	null	null	1.799	-3.8722	0.452	0.876	9168	1
GO:0072330	monocarboxylic acid biosynthetic process	0.00836	null	null	2.248	-5.048	0.529	0.949	9168	1
GO:1901293	nucleoside phosphate biosynthetic process	0.01372	null	null	2.462	-4.0605	0.408	0.802	9168	1
GO:0009205	purine ribonucleoside triphosphate metabolic process	0.01078	null	null	2.358	-3.0655	0.422	0.972	9168	1
GO:0009206	purine ribonucleoside triphosphate biosynthetic process	0.00271	null	null	1.763	-4.6629	0.444	0.973	9168	1
GO:0034404	nucleobase-containing small molecule biosynthetic process	0.01304	null	null	2.439	-4.1119	0.426	0.858	9168	1
GO:0009260	ribonucleotide biosynthetic process	0.01116	null	null	2.373	-3.6616	0.4	0.981	9168	1
GO:0009259	ribonucleotide metabolic process	0.02227	null	null	2.672	-1.9055	0.401	0.968	9168	1
GO:0016053	organic acid biosynthetic process	0.01201	null	null	2.405	-5.7004	0.521	0.85	9168	1
GO:0046390	ribose phosphate biosynthetic process	0.01125	null	null	2.377	-3.5512	0.531	0.844	9168	1
GO:0046394	carboxylic acid biosynthetic process	0.01201	null	null	2.405	-5.7004	0.518	0.533	9168	1
GO:0061615	glycolytic process through fructose-6-phosphate	0.00052	null	null	1.079	-2.1515	0.34	0.801	9168	1
GO:0006096	glycolytic process	0.00332	null	null	1.851	-5.4149	0.265	0.938	9168	1
GO:0006090	pyruvate metabolic process	0.00461	null	null	1.991	-4.646	0.593	0.637	9168	1
GO:0046434	organophosphate catabolic process	0.00541	null	null	2.061	-3.3835	0.56	0.538	9168	1
GO:0006165	nucleoside diphosphate phosphorylation	0.00418	null	null	1.949	-5.7004	0.458	0.963	9168	1
GO:0046939	nucleotide phosphorylation	0.00446	null	null	1.978	-5.678	0.477	0.621	9168	1
GO:0009108	coenzyme biosynthetic process	0.00461	null	null	1.991	-2.9694	0.75	0.818	9168	1
GO:0042866	pyruvate biosynthetic process	0.00019	null	null	0.699	-5.275	0.633	0.673	9168	1
GO:0019674	NAD metabolic process	0.00171	null	null	1.568	-2.5067	0.456	0.884	9168	1
GO:0046496	nicotinamide nucleotide metabolic process	0.00608	null	null	2.111	-5.0571	0.406	0.672	9168	1
GO:0009124	nucleoside monophosphate biosynthetic process	0.00399	null	null	1.929	-5.5043	0.436	0.764	9168	1
GO:0009123	nucleoside monophosphate metabolic process	0.01263	null	null	2.427	-4.1354	0.434	0.733	9168	1
GO:0009126	purine nucleoside monophosphate metabolic process	0.01154	null	null	2.387	-4.3147	0.419	0.967	9168	1
GO:0009127	purine nucleoside monophosphate biosynthetic process	0.00309	null	null	1.82	-5.7004	0.439	0.952	9168	1
GO:0072525	pyridine-containing compound biosynthetic process	0.00095	null	null	1.322	-4.7689	0.717	0.834	9168	1
GO:0009132	nucleoside diphosphate metabolic process	0.00537	null	null	2.057	-5.2587	0.47	0.653	9168	1
GO:0019693	ribose phosphate metabolic process	0.02275	null	null	2.681	-2.6955	0.559	0.657	9168	1
GO:0009135	purine nucleoside diphosphate metabolic process	0.00418	null	null	1.949	-5.048	0.459	0.638	9168	1
GO:0006163	purine nucleotide metabolic process	0.02222	null	null	2.671	-1.7868	0.391	0.95	9168	1
GO:0006164	purine nucleotide biosynthetic process	0.01092	null	null	2.364	-3.5397	0.39	0.98	9168	1
GO:0009145	purine nucleoside triphosphate biosynthetic process	0.00275	null	null	1.771	-4.646	0.444	0.725	9168	1
GO:0009144	purine nucleoside triphosphate metabolic process	0.01116	null	null	2.373	-2.9497	0.421	0.969	9168	1
GO:0009142	nucleoside triphosphate biosynthetic process	0.00347	null	null	1.869	-4.3444	0.442	0.754	9168	1
GO:0009141	nucleoside triphosphate metabolic process	0.01211	null	null	2.408	-2.7195	0.436	0.791	9168	1
GO:0009156	ribonucleoside monophosphate biosynthetic process	0.00366	null	null	1.892	-5.6362	0.433	0.966	9168	1
GO:0009152	purine ribonucleotide biosynthetic process	0.01059	null	null	2.35	-3.8309	0.39	0.84	9168	1
GO:0009150	purine ribonucleotide metabolic process	0.02161	null	null	2.659	-1.9947	0.389	0.889	9168	1
GO:0009161	ribonucleoside monophosphate metabolic process	0.01206	null	null	2.407	-4.2747	0.417	0.972	9168	1
GO:0006732	coenzyme metabolic process	0.01301	null	null	2.439	-3.4797	0.776	0.872	9168	1
GO:0006733	oxidoreduction coenzyme metabolic process	0.00684	null	null	2.161	-4.7195	0.783	0.85	9168	1
GO:0006734	NADH metabolic process	0.00081	null	null	1.255	-3.4073	0.482	0.83	9168	1
GO:0009167	purine ribonucleoside monophosphate metabolic process	0.01149	null	null	2.386	-4.3232	0.418	0.864	9168	1
GO:0009165	nucleotide biosynthetic process	0.01358	null	null	2.458	-3.4973	0.395	0.956	9168	1
GO:0009166	nucleotide catabolic process	0.00242	null	null	1.716	-4.1497	0.458	0.588	9168	1
GO:0009179	purine ribonucleoside diphosphate metabolic process	0.00418	null	null	1.949	-5.048	0.458	0.983	9168	1
GO:0009185	ribonucleoside diphosphate metabolic process	0.00437	null	null	1.968	-4.9448	0.457	0.953	9168	1
GO:0006754	ATP biosynthetic process	0.00209	null	null	1.653	-4.9046	0.428	0.964	9168	1
GO:0051188	cofactor biosynthetic process	0.00655	null	null	2.143	-2.1609	0.75	0.803	9168	1
GO:0006757	ATP generation from ADP	0.00337	null	null	1.857	-5.3905	0.406	0.983	9168	1
GO:0046034	ATP metabolic process	0.00969	null	null	2.312	-3.4398	0.396	0.969	9168	1
GO:0034655	nucleobase-containing compound catabolic process	0.01159	null	null	2.389	-1.5357	0.709	0.811	9168	1
GO:0046031	ADP metabolic process	0.00361	null	null	1.886	-5.1399	0.434	0.963	9168	1
GO:0009201	ribonucleoside triphosphate biosynthetic process	0.00294	null	null	1.799	-4.6124	0.441	0.963	9168	1
GO:0019363	pyridine nucleotide biosynthetic process	0.00081	null	null	1.255	-4.8933	0.452	0.976	9168	1
GO:0019362	pyridine nucleotide metabolic process	0.00608	null	null	2.111	-5.048	0.406	0.986	9168	1
GO:0019359	nicotinamide nucleotide biosynthetic process	0.00081	null	null	1.255	-4.9706	0.452	0.83	9168	1
GO:0009199	ribonucleoside triphosphate metabolic process	0.01106	null	null	2.369	-3.0091	0.422	0.858	9168	1
GO:0006091	generation of precursor metabolites and energy	0.01515	-6.393	-3.823	2.505	-5.6231	0.874	0.086	6091	0
GO:0046683	response to organophosphorus	0.00575	2.197	-0.619	2.086	-1.3465	0.981	0.096	46683	0
GO:0050879	multicellular organismal movement	0.00228	6.904	1.916	1.69	-2.147	0.916	0.122	50879	0
GO:0072524	pyridine-containing compound metabolic process	0.00632	-5.06	3.903	2.127	-4.9706	0.753	0.187	72524	0
GO:0014706	striated muscle tissue development	0.01823	2.719	6.396	2.585	-4.3147	0.887	0.241	14706	0
GO:0060537	muscle tissue development	0.01918	null	null	2.607	-4.6124	0.905	0.564	14706	1
GO:0007519	skeletal muscle tissue development	0.00845	null	null	2.253	-3.5867	0.763	0.884	14706	1
GO:0010927	cellular component assembly involved in morphogenesis	0.00475	3.103	5.17	2.004	-2.2765	0.831	0.272	10927	0
GO:0035051	cardiocyte differentiation	0.00689	4.742	3.95	2.164	-2.4876	0.794	0.294	35051	0
GO:0046716	muscle cell cellular homeostasis	0.00085	3.718	-5.408	1.279	-1.5969	0.875	0.333	46716	0
GO:0050900	leukocyte migration	0.0141	-0.587	-6.117	2.474	-1.305	0.858	0.392	50900	0
GO:0046184	aldehyde biosynthetic process	0.00071	-2.136	6.671	1.204	-1.7033	0.684	0.417	46184	0
GO:0006936	muscle contraction	0.01273	6.856	-0.867	2.43	-5.7004	0.846	0.418	6936	0
GO:0043501	skeletal muscle adaptation	0.00119	null	null	1.415	-2.6046	0.861	0.728	6936	1
GO:0003009	skeletal muscle contraction	0.00166	null	null	1.556	-2.7729	0.815	0.809	6936	1
GO:0050881	musculoskeletal movement	0.00228	null	null	1.69	-2.147	0.895	0.972	6936	1
GO:0014819	regulation of skeletal muscle contraction	0.00047	null	null	1.041	-2.0704	0.824	0.864	6936	1
GO:0090075	relaxation of muscle	0.00142	null	null	1.491	-2.1609	0.869	0.74	6936	1
GO:0014733	regulation of skeletal muscle adaptation	0.00071	null	null	1.204	-1.9055	0.857	0.878	6936	1
GO:0090257	regulation of muscle system process	0.00897	null	null	2.279	-3.5512	0.844	0.89	6936	1
GO:0006942	regulation of striated muscle contraction	0.00328	null	null	1.845	-3.0984	0.846	0.801	6936	1
GO:0006941	striated muscle contraction	0.00717	null	null	2.182	-5.0571	0.85	0.869	6936	1
GO:0006937	regulation of muscle contraction	0.00617	null	null	2.117	-1.6512	0.842	0.864	6936	1
GO:0014888	striated muscle adaptation	0.00214	null	null	1.663	-1.51	0.857	0.838	6936	1
GO:0060048	cardiac muscle contraction	0.00527	null	null	2.049	-1.4754	0.849	0.894	6936	1
GO:1903514	calcium ion transport from endoplasmic reticulum to cytosol	0.00095	2.811	-5.635	1.322	-1.5445	0.865	0.449	1903514	0
GO:0014808	release of sequestered calcium ion into cytosol by sarcoplasmic reticulum	0.0009	null	null	1.301	-1.5969	0.858	0.975	1903514	1
GO:0010880	regulation of release of sequestered calcium ion into cytosol by sarcoplasmic reticulum	0.00071	null	null	1.204	-1.7033	0.86	0.722	1903514	1
GO:0072522	purine-containing compound biosynthetic process	0.01121	-4.274	4.492	2.375	-4.1354	0.672	0.455	72522	0
GO:0072521	purine-containing compound metabolic process	0.02422	null	null	2.708	-2.3325	0.72	0.53	72522	1
GO:0044270	cellular nitrogen compound catabolic process	0.01344	-5.881	1.919	2.453	-1.6729	0.731	0.493	44270	0
GO:0046700	heterocycle catabolic process	0.01349	null	null	2.455	-1.633	0.719	0.6	44270	1
GO:0019439	aromatic compound catabolic process	0.01415	null	null	2.476	-1.5391	0.721	0.604	44270	1

## Sheet: REViGO_CC
term_ID	description	frequency	plot_X	plot_Y	plot_size	log10 p-value	uniqueness	dispensability	representative	eliminated
GO:0030016	myofibril	0.00996	-5.523	1.496	2.326	-10.6304	0.386	0	30016	0
GO:0030018	Z disc	0.00581	null	null	2.093	-8.3907	0.4	0.926	30016	1
GO:0036379	myofilament	0.00113	null	null	1.398	-3.2355	0.452	0.794	30016	1
GO:0030017	sarcomere	0.00883	null	null	2.274	-8.8746	0.386	0.968	30016	1
GO:0005865	striated muscle thin filament	0.00099	null	null	1.342	-3.2815	0.397	0.784	30016	1
GO:0005876	spindle microtubule	0.00227	null	null	1.69	-1.4805	0.473	0.57	30016	1
GO:0044449	contractile fiber part	0.00939	null	null	2.301	-8.601	0.388	0.974	30016	1
GO:0097431	mitotic spindle pole	0.00071	null	null	1.204	-1.3523	0.635	0.629	30016	1
GO:0031674	I band	0.00656	null	null	2.146	-8.778	0.395	0.938	30016	1
GO:0043292	contractile fiber	0.01039	null	null	2.344	-10.4052	0.486	0.665	30016	1
GO:1990351	transporter complex	0.01416	2.861	4.853	2.479	-3.2054	0.752	0	1990351	0
GO:0042383	sarcolemma	0.00552	3.131	-4.547	2.072	-2.2735	0.851	0.01	42383	0
GO:0033267	axon part	0.00854	-3.198	-5.077	2.26	-2.3406	0.903	0.01	33267	0
GO:0008076	voltage-gated potassium channel complex	0.00373	4.107	0.996	1.903	-3.2785	0.548	0.222	8076	0
GO:0034702	ion channel complex	0.01256	null	null	2.427	-2.9505	0.554	0.846	8076	1
GO:0034703	cation channel complex	0.00779	null	null	2.22	-2.1018	0.563	0.914	8076	1
GO:0034705	potassium channel complex	0.00406	null	null	1.94	-3.1175	0.573	0.868	8076	1
GO:1902495	transmembrane transporter complex	0.01388	null	null	2.47	-3.2349	0.552	0.97	8076	1
GO:0005581	collagen trimer	0.00397	1.371	6.403	1.929	-1.6499	0.755	0.224	5581	0
GO:1902911	protein kinase complex	0.00519	4.565	5.298	2.045	-1.9903	0.765	0.23	1902911	0
GO:0030315	T-tubule	0.00217	5.682	-2.527	1.672	-1.916	0.829	0.321	30315	0
GO:0015629	actin cytoskeleton	0.02058	-5.231	3.093	2.64	-4.4117	0.597	0.323	15629	0
GO:0016459	myosin complex	0.0033	-1.549	4.037	1.851	-3.1175	0.485	0.446	16459	0
GO:0032982	myosin filament	0.00085	null	null	1.279	-3.2054	0.521	0.595	16459	1

## Sheet: REViGO_MF
term_ID	description	frequency	plot_X	plot_Y	plot_size	log10 p-value	uniqueness	dispensability	representative	eliminated
GO:0004683	calmodulin-dependent protein kinase activity	0.00129	0.999	0	1.447	-1.4774	0	0	4683	0
GO:0044325	ion channel binding	0.00517	0	0.995	2.037	-1.4838	0	0	44325	0

## Sheet: REViGO_summary
	term_ID	description	frequency	plot_X	plot_Y	plot_size	log10 p-value	uniqueness	dispensability	representative	eliminated
CC	GO:0030016	myofibril	0.00996	-5.523	1.496	2.326	-10.6304	0.386	0	30016	0
BP	GO:0003012	muscle system process	0.01643	6.693	-1.353	2.54	-6.5394	0.909	0	3012	0
BP	GO:0016052	carbohydrate catabolic process	0.00556	-6.745	0.188	2.072	-6.5377	0.694	0	16052	0
BP	GO:0051146	striated muscle cell differentiation	0.01263	3.986	5.651	2.427	-6.2193	0.74	0	51146	0
BP	GO:0014706	striated muscle tissue development	0.01823	2.719	6.396	2.585	-4.3147	0.887	0.241	14706	0
BP	GO:0009168	purine ribonucleoside monophosphate biosynthetic process	0.00309	-3.238	5.499	1.82	-5.7004	0.439	0.077	9168	0
BP	GO:0072522	purine-containing compound biosynthetic process	0.01121	-4.274	4.492	2.375	-4.1354	0.672	0.455	72522	0
BP	GO:0006936	muscle contraction	0.01273	6.856	-0.867	2.43	-5.7004	0.846	0.418	6936	0
BP	GO:0006091	generation of precursor metabolites and energy	0.01515	-6.393	-3.823	2.505	-5.6231	0.874	0.086	6091	0
BP	GO:0072524	pyridine-containing compound metabolic process	0.00632	-5.06	3.903	2.127	-4.9706	0.753	0.187	72524	0
CC	GO:0015629	actin cytoskeleton	0.02058	-5.231	3.093	2.64	-4.4117	0.597	0.323	15629	0
CC	GO:0008076	voltage-gated potassium channel complex	0.00373	4.107	0.996	1.903	-3.2785	0.548	0.222	8076	0
CC	GO:1990351	transporter complex	0.01416	2.861	4.853	2.479	-3.2054	0.752	0	1990351	0
CC	GO:0016459	myosin complex	0.0033	-1.549	4.037	1.851	-3.1175	0.485	0.446	16459	0
BP	GO:0001780	neutrophil homeostasis	0.00076	1.814	-5.836	1.23	-2.679	0.939	0	1780	0
BP	GO:0035051	cardiocyte differentiation	0.00689	4.742	3.95	2.164	-2.4876	0.794	0.294	35051	0
CC	GO:0033267	axon part	0.00854	-3.198	-5.077	2.26	-2.3406	0.903	0.01	33267	0
BP	GO:0010927	cellular component assembly involved in morphogenesis	0.00475	3.103	5.17	2.004	-2.2765	0.831	0.272	10927	0
CC	GO:0042383	sarcolemma	0.00552	3.131	-4.547	2.072	-2.2735	0.851	0.01	42383	0
BP	GO:0033275	actin-myosin filament sliding	0.00047	-2.378	-6.218	1.041	-2.2408	0.864	0.065	33275	0
BP	GO:0050879	multicellular organismal movement	0.00228	6.904	1.916	1.69	-2.147	0.916	0.122	50879	0
CC	GO:1902911	protein kinase complex	0.00519	4.565	5.298	2.045	-1.9903	0.765	0.23	1902911	0
CC	GO:0030315	T-tubule	0.00217	5.682	-2.527	1.672	-1.916	0.829	0.321	30315	0
BP	GO:0046184	aldehyde biosynthetic process	0.00071	-2.136	6.671	1.204	-1.7033	0.684	0.417	46184	0
BP	GO:0044270	cellular nitrogen compound catabolic process	0.01344	-5.881	1.919	2.453	-1.6729	0.731	0.493	44270	0
CC	GO:0005581	collagen trimer	0.00397	1.371	6.403	1.929	-1.6499	0.755	0.224	5581	0
BP	GO:0046716	muscle cell cellular homeostasis	0.00085	3.718	-5.408	1.279	-1.5969	0.875	0.333	46716	0
BP	GO:0045926	negative regulation of growth	0.01049	-1.388	-0.366	2.346	-1.5482	0.963	0.04	45926	0
BP	GO:0019722	calcium-mediated signaling	0.00651	-4.304	-3.309	2.14	-1.5445	0.934	0.057	19722	0
BP	GO:1903514	calcium ion transport from endoplasmic reticulum to cytosol	0.00095	2.811	-5.635	1.322	-1.5445	0.865	0.449	1903514	0
MF	GO:0044325	ion channel binding	0.00517	0	0.995	2.037	-1.4838	0	0	44325	0
MF	GO:0004683	calmodulin-dependent protein kinase activity	0.00129	0.999	0	1.447	-1.4774	0	0	4683	0
BP	GO:0046683	response to organophosphorus	0.00575	2.197	-0.619	2.086	-1.3465	0.981	0.096	46683	0
BP	GO:0050900	leukocyte migration	0.0141	-0.587	-6.117	2.474	-1.305	0.858	0.392	50900	0

## Sheet: DESeq2 pairwise results
The results generated from the pairwise comparison EDL,psaos and soleus for the genes group in gene Cluster 4
				Psoas/EDL						Soleus/EDL						Soleus/Posas
	geneID	baseMean		log2FoldChange	lfcSE	stat	pvalue	padj		log2FoldChange	lfcSE	stat	pvalue	padj		log2FoldChange	lfcSE	stat	pvalue	padj
ENSMUSG00000002265	Peg3	685.004		-1.55539	0.415637	-3.74218	0.00018243	0.00224145		-2.38253	0.554617	-4.29581	1.74058e-05	0.000647047		-0.827142	0.556451	-1.48646	0.137157	0.420666
ENSMUSG00000004105	Angptl2	856.336		-1.06064	0.30608	-3.46525	0.000529742	0.00527102		-2.18153	0.408676	-5.33803	9.39614e-08	6.53963e-06		-1.12088	0.40975	-2.73553	0.00622802	0.054589
ENSMUSG00000020256	Aldh1l2	170.338		-1.06814	0.327037	-3.26611	0.00109037	0.00937941		-1.79552	0.440755	-4.07373	4.6266e-05	0.00147796		-0.727377	0.445495	-1.63274	0.102524	0.358545
ENSMUSG00000026147	Col9a1	33.8497		-1.49683	0.394504	-3.79421	0.000148111	0.00191925		-6.73977	1.45302	-4.63846	3.5101e-06	0.000163587		-5.24294	1.46205	-3.58602	0.000335767	0.00560896
ENSMUSG00000028197	Col24a1	130.146		-1.18859	0.278533	-4.26733	1.97826e-05	0.000378538		-1.67072	0.388361	-4.30197	1.69287e-05	0.000632961		-0.482126	0.397916	-1.21163	0.225655	0.543361
ENSMUSG00000029054	Gabrd	14.4457		-2.52388	0.652436	-3.8684	0.000109551	0.00151672		-4.31185	1.13872	-3.78656	0.000152745	0.00398221		-1.78797	1.19021	-1.50223	0.133037	0.412374
ENSMUSG00000029669	Tspan12	558.871		-1.09362	0.308346	-3.54673	0.000390038	0.00416091		-1.58642	0.410093	-3.86845	0.000109529	0.00303587		-0.492804	0.41172	-1.19694	0.231331	0.549978
ENSMUSG00000031099	Smarca1	177.168		1.0509	0.256318	4.09999	4.13161e-05	0.000687424		-2.68649	0.406924	-6.60195	4.05794e-11	5.93624e-09		-3.7374	0.40488	-9.23088	2.68423e-20	1.69807e-17
ENSMUSG00000039419	Cntnap2	129.99		-1.78008	0.265411	-6.70688	1.98829e-11	2.57866e-09		-4.71386	0.439029	-10.737	6.82034e-27	6.73466e-24		-2.93378	0.445936	-6.57893	4.73842e-11	5.97174e-09
ENSMUSG00000041329	Atp1b2	149.044		1.24314	0.309859	4.01193	6.02232e-05	0.000928685		-2.29718	0.463695	-4.95407	7.2676e-07	3.94766e-05		-3.54031	0.461029	-7.67916	1.6013e-14	3.28154e-12
ENSMUSG00000066113	Adamtsl1	113.689		-1.35688	0.399285	-3.39827	0.000678124	0.00643116		-2.17687	0.54616	-3.98577	6.72609e-05	0.0020088		-0.819988	0.553616	-1.48115	0.138566	0.42276
ENSMUSG00000101257	2310015K22Rik	41.6482		1.4398	0.443024	3.24993	0.00115434	0.00981284		-3.06493	0.727244	-4.21445	2.50383e-05	0.000873246		-4.50473	0.722146	-6.23798	4.43256e-10	4.41738e-08
ENSMUSG00000000305	Cdh4	31.1954		0.0989897	0.559964	0.176778	0.859682	0.929632		-3.13317	0.882414	-3.55068	0.000384238	0.00843135		-3.23216	0.88417	-3.65558	0.000256597	0.00450904
ENSMUSG00000000532	Acvr1b	444.875		0.229122	0.265377	0.863382	0.387928	0.595972		-2.01932	0.362113	-5.57648	2.45429e-08	1.97833e-06		-2.24844	0.362282	-6.20633	5.42352e-10	5.3319e-08
ENSMUSG00000000594	Gm2a	280.106		-0.751023	0.221048	-3.39755	0.000679918	0.00644152		-1.09747	0.300747	-3.64913	0.000263129	0.00623875		-0.346443	0.304641	-1.13722	0.255448	0.578625
ENSMUSG00000005716	Pvalb	84408		0.174091	0.67178	0.259149	0.79552	0.895496		-5.03703	0.888862	-5.66683	1.45465e-08	1.21598e-06		-5.21112	0.888863	-5.86268	4.5545e-09	3.48779e-07
ENSMUSG00000006457	Actn3	55367.2		1.08764	0.458809	2.37057	0.0177609	0.0757459		-3.86332	0.607205	-6.36247	1.98539e-10	2.6359e-08		-4.95096	0.607201	-8.15374	3.52849e-16	1.00666e-13
ENSMUSG00000006542	Prkag3	563.416		0.350932	0.339498	1.03368	0.301286	0.512258		-2.42052	0.461897	-5.24038	1.60243e-07	1.04088e-05		-2.77145	0.46191	-5.99998	1.97341e-09	1.67913e-07
ENSMUSG00000006850	Tmco6	72.4824		-0.404287	0.286274	-1.41224	0.15788	0.333386		-1.70389	0.417141	-4.0847	4.41345e-05	0.00141436		-1.29961	0.422774	-3.074	0.00211209	0.0244696
ENSMUSG00000007122	Casq1	28842.9		0.0491477	0.210673	0.233289	0.815537	0.906094		-1.9362	0.278879	-6.94279	3.84431e-12	6.67431e-10		-1.98535	0.278887	-7.11882	1.08853e-12	1.75979e-10
ENSMUSG00000008658	Rbfox1	1125.08		0.426617	0.233655	1.82584	0.067874	0.188837		-1.41135	0.313689	-4.49921	6.82052e-06	0.000297672		-1.83797	0.313645	-5.86004	4.62756e-09	3.52048e-07
ENSMUSG00000010461	Eya4	503.832		0.198556	0.372969	0.532367	0.594472	0.767768		-2.46695	0.507974	-4.85646	1.19504e-06	6.23608e-05		-2.66551	0.508154	-5.24548	1.55874e-07	7.87491e-06
ENSMUSG00000010721	Lmbr1	443.409		-0.53989	0.235151	-2.29592	0.0216802	0.0866866		-1.69214	0.318507	-5.31274	1.07989e-07	7.3224e-06		-1.15225	0.320025	-3.60052	0.000317582	0.0053668
ENSMUSG00000015312	Gadd45b	263.676		0.126467	0.386074	0.327572	0.743235	0.8648		-2.24477	0.530081	-4.23477	2.28789e-05	0.000808644		-2.37124	0.530502	-4.4698	7.82932e-06	0.000238819
ENSMUSG00000017491	Rarb	239.294		-0.518436	0.202051	-2.56587	0.0102918	0.0509518		-1.04297	0.275281	-3.78875	0.000151405	0.0039578		-0.524535	0.278558	-1.88304	0.0596954	0.259214
ENSMUSG00000019088	Dnase1l1	894.78		0.0455545	0.19137	0.238045	0.811847	0.903907		-1.02848	0.256684	-4.00678	6.15532e-05	0.00187015		-1.07403	0.257012	-4.17892	2.92902e-05	0.00074767
ENSMUSG00000019370	Calm3	3738.25		0.144854	0.247067	0.586293	0.557679	0.74078		-1.21201	0.327862	-3.69671	0.000218415	0.00533345		-1.35686	0.327909	-4.13792	3.50463e-05	0.000862816
ENSMUSG00000019916	P4ha1	1068.31		-0.581685	0.153977	-3.77773	0.000158264	0.00201299		-1.66376	0.209624	-7.93685	2.07379e-15	5.74803e-13		-1.08207	0.210803	-5.13311	2.84991e-07	1.34195e-05
ENSMUSG00000020150	Gamt	127.49		0.305299	0.296349	1.0302	0.302915	0.513946		-1.5211	0.415444	-3.66138	0.000250864	0.00599606		-1.8264	0.415671	-4.39386	1.11358e-05	0.000327987
ENSMUSG00000020386	Sar1b	6061.97		0.352461	0.251636	1.40068	0.161311	0.338447		-1.74929	0.333847	-5.2398	1.60753e-07	1.04088e-05		-2.10175	0.333849	-6.29552	3.06363e-10	3.16141e-08
ENSMUSG00000020546	Stxbp4	232.601		-0.286854	0.237769	-1.20644	0.227649	0.426357		-2.04423	0.339954	-6.01325	1.81843e-09	1.77342e-07		-1.75737	0.342	-5.13852	2.76911e-07	1.31239e-05
ENSMUSG00000021182	Ccdc88c	438.054		0.274204	0.185886	1.47512	0.14018	0.30953		-2.10244	0.26643	-7.89115	2.99418e-15	8.01779e-13		-2.37664	0.266604	-8.91448	4.90111e-19	2.30036e-16
ENSMUSG00000022235	Cmbl	523.618		-0.657949	0.320216	-2.0547	0.0399076	0.131879		-2.06855	0.428707	-4.8251	1.39936e-06	7.13177e-05		-1.4106	0.429667	-3.28301	0.00102704	0.0138879
ENSMUSG00000022822	Abcc5	523.861		0.00647771	0.219974	0.0294476	0.976508	0.988743		-1.05973	0.29887	-3.54579	0.000391436	0.0085655		-1.06621	0.299527	-3.55964	0.000371358	0.00611229
ENSMUSG00000023019	Gpd1	3030.84		0.776846	0.30182	2.57387	0.0100567	0.0500986		-2.85189	0.402875	-7.07886	1.45349e-12	2.76671e-10		-3.62874	0.402805	-9.00868	2.08543e-19	1.04631e-16
ENSMUSG00000023456	Tpi1	32273.1		0.562662	0.224853	2.50235	0.0123372	0.0580098		-1.15387	0.297587	-3.87743	0.000105567	0.00294037		-1.71653	0.297582	-5.76827	8.00901e-09	5.5491e-07
ENSMUSG00000023886	Smoc2	1812.73		-0.456656	0.198352	-2.30225	0.0213209	0.0857012		-1.36132	0.26456	-5.1456	2.66668e-07	1.60805e-05		-0.904665	0.265029	-3.41345	0.000641449	0.00949449
ENSMUSG00000023913	Pla2g7	158.448		-0.26893	0.273274	-0.984107	0.325063	0.536529		-2.10693	0.402175	-5.23885	1.61578e-07	1.04195e-05		-1.838	0.404967	-4.53865	5.66149e-06	0.000179858
ENSMUSG00000024134	Six2	8.36851		-1.05504	0.756644	-1.39436	0.163209	0.340531		-6.30237	1.72746	-3.64835	0.000263926	0.00624217		-5.24734	1.74587	-3.00557	0.00265084	NA
ENSMUSG00000024411	Aqp4	1987.32		0.95044	0.222158	4.27822	1.88393e-05	0.000364163		-1.48093	0.296912	-4.98778	6.10782e-07	3.36716e-05		-2.43137	0.296693	-8.1949	2.50807e-16	7.29848e-14
ENSMUSG00000024420	Zfp521	245.993		-0.33627	0.232157	-1.44846	0.147489	0.31976		-1.20705	0.319215	-3.78131	0.000156008	0.00403281		-0.870779	0.321591	-2.70772	0.00677471	0.0578135
ENSMUSG00000025089	Gfra1	119.621		-0.446872	0.329653	-1.35559	0.175231	0.356511		-1.83246	0.458849	-3.99359	6.50791e-05	0.00195472		-1.38558	0.462158	-2.99807	0.00271695	0.0295453
ENSMUSG00000025161	Slc16a3	1902.03		0.16873	0.342088	0.493235	0.621847	0.787441		-2.85102	0.45763	-6.22997	4.66514e-10	5.5417e-08		-3.01975	0.457688	-6.59784	4.17185e-11	5.41968e-09
ENSMUSG00000025537	Phkg1	5479.96		0.123392	0.234948	0.525188	0.599453	0.770994		-2.73539	0.312574	-8.75119	2.11123e-18	1.01077e-15		-2.85878	0.312602	-9.14511	5.95706e-20	3.46701e-17
ENSMUSG00000025586	Cpeb1	147.091		-0.486248	0.261051	-1.86265	0.0625112	0.179309		-1.63126	0.381693	-4.27375	1.92214e-05	0.000706231		-1.14501	0.386629	-2.96153	0.00306114	0.0323454
ENSMUSG00000025648	Pfkfb4	603.734		0.590388	0.240654	2.45327	0.0141566	0.0641652		-1.451	0.326645	-4.44214	8.90679e-06	0.000368373		-2.04139	0.32638	-6.25464	3.98442e-10	4.02593e-08
ENSMUSG00000025777	Gdap1	235.73		-0.495587	0.297945	-1.66335	0.0962425	0.241705		-3.04569	0.439128	-6.93578	4.03972e-12	6.93735e-10		-2.55011	0.441507	-5.77592	7.65322e-09	5.32796e-07
ENSMUSG00000025791	Pgm1	15148.6		0.822345	0.230088	3.57405	0.000351505	0.00382621		-1.70532	0.304781	-5.59523	2.20324e-08	1.78507e-06		-2.52767	0.30476	-8.29394	1.09554e-16	3.39152e-14
ENSMUSG00000026100	Mstn	1066.51		0.647674	0.863591	0.749978	0.453268	0.657417		-4.52559	1.15432	-3.92055	8.83468e-05	0.00252861		-5.17326	1.15427	-4.48183	7.40059e-06	0.00022717
ENSMUSG00000026141	Col19a1	12.6421		0.310146	0.669079	0.463542	0.642976	0.801554		-5.98018	1.68717	-3.54451	0.000393341	0.00858343		-6.29033	1.68769	-3.72718	0.000193638	0.00356449
ENSMUSG00000026170	Cyp27a1	710.617		-0.287953	0.28278	-1.01829	0.308538	0.519906		-1.41291	0.379836	-3.71978	0.000199398	0.00491465		-1.12495	0.380602	-2.95572	0.00311936	0.0327702
ENSMUSG00000026173	Plcd4	1158.27		0.000329273	0.202962	0.00162234	0.998706	0.999496		-3.24474	0.282795	-11.4738	1.78584e-30	2.17034e-27		-3.24507	0.283038	-11.4651	1.97473e-30	3.19248e-27
ENSMUSG00000026180	Cxcr2	144.757		0.412149	0.489433	0.842096	0.399734	0.606982		-2.82089	0.682838	-4.13113	3.60987e-05	0.00119315		-3.23304	0.682745	-4.73536	2.18671e-06	7.9741e-05
ENSMUSG00000026185	Igfbp5	1202.2		-0.379147	0.283669	-1.33658	0.181359	0.365219		-1.5485	0.377832	-4.0984	4.16024e-05	0.00134412		-1.16936	0.378266	-3.09137	0.00199238	0.0233595
ENSMUSG00000026279	Thap4	167.746		-0.302808	0.2591	-1.16869	0.242527	0.445803		-1.5454	0.359205	-4.30229	1.69042e-05	0.000632961		-1.2426	0.361627	-3.43613	0.000590091	0.00884499
ENSMUSG00000026469	Xpr1	1407.28		-0.263727	0.237209	-1.11179	0.266228	0.473552		-1.37522	0.315599	-4.3575	1.31558e-05	0.0005166		-1.1115	0.315912	-3.51837	0.000434199	0.0069196
ENSMUSG00000026773	Pfkfb3	984.039		-0.799435	0.339799	-2.35267	0.018639	0.0782589		-3.54094	0.459778	-7.70142	1.34561e-14	3.32178e-12		-2.74151	0.460416	-5.95441	2.61017e-09	2.09823e-07
ENSMUSG00000026827	Gpd2	3074.96		0.194889	0.228906	0.851394	0.39455	0.602062		-3.89833	0.308622	-12.6314	1.41713e-36	2.79865e-33		-4.09322	0.30865	-13.2617	3.861e-40	7.02219e-37
ENSMUSG00000026915	Strbp	485.342		0.190816	0.210136	0.908062	0.363846	0.572658		-1.45834	0.287829	-5.06669	4.04792e-07	2.32557e-05		-1.64916	0.288119	-5.72387	1.04123e-08	6.98154e-07
ENSMUSG00000027009	Itga4	174.052		-0.174749	0.449499	-0.388765	0.69745	0.836517		-3.21352	0.640152	-5.01994	5.16872e-07	2.90607e-05		-3.03877	0.641373	-4.73792	2.15923e-06	7.91353e-05
ENSMUSG00000027075	Slc43a1	231.8		-0.131159	0.232445	-0.564258	0.572578	0.751908		-2.27836	0.332538	-6.85144	7.31112e-12	1.20321e-09		-2.14721	0.333843	-6.43178	1.26116e-10	1.42247e-08
ENSMUSG00000027200	Sema6d	292.443		-0.111497	0.183005	-0.609256	0.542355	0.730277		-1.02612	0.257128	-3.9907	6.58799e-05	0.00197502		-0.914622	0.258893	-3.53282	0.000411145	0.00661743
ENSMUSG00000027469	Tpx2	41.9012		-0.946302	0.375668	-2.51899	0.0117693	0.0559835		-2.2745	0.591457	-3.84558	0.000120265	0.00325913		-1.32819	0.606313	-2.19061	0.0284802	0.157681
ENSMUSG00000027470	Mylk2	6533.03		0.747586	0.195371	3.82648	0.000129986	0.00173628		-1.99293	0.259576	-7.67763	1.62063e-14	3.87943e-12		-2.74051	0.259535	-10.5593	4.59969e-26	6.69254e-23
ENSMUSG00000027496	Aurka	66.0595		0.241805	0.333127	0.725863	0.467923	0.669771		-2.93732	0.588617	-4.99022	6.03118e-07	3.34339e-05		-3.17913	0.589406	-5.39378	6.899e-08	3.78794e-06
ENSMUSG00000027654	Fam83d	35.4525		0.57369	0.488576	1.17421	0.240312	0.44305		-4.02514	0.909479	-4.42576	9.61021e-06	0.000396427		-4.59883	0.908409	-5.06251	4.13772e-07	1.81885e-05
ENSMUSG00000027832	Ptx3	153.588		0.528679	0.217532	2.43035	0.0150841	0.0671813		-2.16103	0.348183	-6.20659	5.41461e-10	6.11039e-08		-2.68971	0.347459	-7.74109	9.85702e-15	2.14059e-12
ENSMUSG00000027895	Kcnc4	92.1685		-0.558688	0.325062	-1.71871	0.0856671	0.222018		-4.07224	0.530383	-7.67793	1.61675e-14	3.87943e-12		-3.51355	0.533381	-6.58733	4.47817e-11	5.71556e-09
ENSMUSG00000028132	Tlcd4	1342.14		0.927401	0.273268	3.39374	0.000689454	0.00650608		-2.41678	0.367784	-6.57121	4.99095e-11	7.16837e-09		-3.34419	0.367564	-9.09824	9.18114e-20	4.94761e-17
ENSMUSG00000028289	Epha7	66.7464		-1.35275	0.442081	-3.05996	0.00221366	0.0161181		-3.21243	0.633143	-5.07379	3.89965e-07	2.24856e-05		-1.85968	0.641646	-2.8983	0.0037519	0.0375706
ENSMUSG00000028328	Tmod1	1634.25		0.782504	0.24759	3.16048	0.0015751	0.0124482		-1.23356	0.330065	-3.73732	0.000185989	0.00463477		-2.01606	0.329894	-6.11125	9.88541e-10	9.16132e-08
ENSMUSG00000028780	Sema3c	2384.76		-0.84991	0.205583	-4.13415	3.56273e-05	0.000612242		-1.53116	0.273087	-5.60687	2.06023e-08	1.67781e-06		-0.68125	0.27356	-2.49031	0.0127631	0.0916324
ENSMUSG00000028927	Padi2	196.782		-0.240089	0.387432	-0.619695	0.535459	0.724804		-2.59662	0.529093	-4.90768	9.2159e-07	4.90242e-05		-2.35653	0.530059	-4.44579	8.75676e-06	0.000263791
ENSMUSG00000029059	Prxl2b	877.528		0.701768	0.304195	2.30697	0.0210564	0.0849535		-1.73874	0.408131	-4.26025	2.04196e-05	0.00073655		-2.44051	0.407919	-5.98283	2.19296e-09	1.82329e-07
ENSMUSG00000029174	Tbc1d1	1013.43		0.15796	0.30129	0.52428	0.600084	0.771536		-1.41656	0.401223	-3.53062	0.000414593	0.00892403		-1.57452	0.401333	-3.92324	8.73669e-05	0.00183964
ENSMUSG00000029246	Ppat	827.942		0.0875233	0.170909	0.512103	0.608579	0.777786		-1.12208	0.231087	-4.85565	1.19993e-06	6.23608e-05		-1.2096	0.231429	-5.22665	1.72605e-07	8.6007e-06
ENSMUSG00000029312	Klhl8	681.712		0.316063	0.222835	1.41837	0.156082	0.331162		-1.16022	0.299427	-3.87482	0.000106705	0.0029628		-1.47629	0.299478	-4.92953	8.24264e-07	3.4364e-05
ENSMUSG00000029610	Aimp2	872.304		0.225038	0.374122	0.601508	0.547501	0.733968		-1.77433	0.50049	-3.54518	0.000392339	0.00857339		-1.99937	0.500585	-3.99407	6.49498e-05	0.00142903
ENSMUSG00000029862	Clcn1	595.083		0.0730428	0.197249	0.370307	0.711154	0.843656		-1.10246	0.268302	-4.10902	3.97339e-05	0.00129168		-1.1755	0.268798	-4.37317	1.22453e-05	0.00035281
ENSMUSG00000030401	Rtn2	3012.48		0.303231	0.220911	1.37264	0.169864	0.349372		-1.1512	0.293262	-3.92551	8.65478e-05	0.00248161		-1.45443	0.293277	-4.95924	7.07696e-07	2.97601e-05
ENSMUSG00000030560	Ctsc	1079.54		-0.606643	0.186908	-3.24568	0.00117172	0.0099217		-1.63969	0.252063	-6.5051	7.76396e-11	1.08551e-08		-1.03305	0.253076	-4.08197	4.46548e-05	0.00104937
ENSMUSG00000030672	Mylpf	123581		0.218303	0.229219	0.952378	0.340905	0.551109		-1.72513	0.303272	-5.68838	1.28247e-08	1.07776e-06		-1.94343	0.303273	-6.40819	1.47255e-10	1.63554e-08
ENSMUSG00000030695	Aldoa	179575		0.693135	0.27268	2.54193	0.0110241	0.0533419		-1.59281	0.360746	-4.41531	1.00865e-05	0.00041284		-2.28594	0.360745	-6.33672	2.34705e-10	2.47461e-08
ENSMUSG00000030774	Pak1	358.096		-0.0661264	0.325465	-0.203175	0.838998	0.919024		-2.37431	0.445936	-5.32434	1.01323e-07	6.95998e-06		-2.30819	0.446545	-5.16899	2.35362e-07	1.13771e-05
ENSMUSG00000030978	Rrm1	686.661		-0.0071865	0.191051	-0.0376156	0.969994	0.986237		-1.07335	0.258375	-4.15424	3.26375e-05	0.00109246		-1.06616	0.258919	-4.11775	3.82582e-05	0.000921618
ENSMUSG00000031239	Itm2a	3224.24		-0.541445	0.403326	-1.34245	0.17945	0.362579		-1.93022	0.53418	-3.61342	0.000302186	0.0069393		-1.38877	0.534293	-2.59927	0.00934217	0.0729229
ENSMUSG00000031431	Tsc22d3	2621.42		0.0934504	0.366709	0.254836	0.79885	0.897575		-1.71943	0.486584	-3.53368	0.00040982	0.00885738		-1.81288	0.48664	-3.7253	0.000195083	0.0035794
ENSMUSG00000031461	Myom2	21038.6		0.69529	0.228435	3.04371	0.00233679	0.0167573		-1.14964	0.302357	-3.80225	0.000143387	0.00380735		-1.84493	0.302347	-6.10203	1.04729e-09	9.58374e-08
ENSMUSG00000031647	Mfap3l	229.145		0.685738	0.231359	2.96395	0.00303713	0.0204099		-2.05144	0.330743	-6.20252	5.5567e-10	6.22626e-08		-2.73718	0.329991	-8.2947	1.0886e-16	3.39152e-14
ENSMUSG00000031700	Gpt2	3792.59		0.423884	0.270336	1.56799	0.116883	0.274882		-2.43198	0.35995	-6.75643	1.41434e-11	2.23452e-09		-2.85586	0.35994	-7.93427	2.11738e-15	5.05046e-13
ENSMUSG00000031885	Cbfb	2080.04		0.610595	0.194649	3.13689	0.00170747	0.013326		-1.61475	0.260687	-6.19422	5.85748e-10	6.47149e-08		-2.22535	0.260588	-8.53973	1.34536e-17	4.77439e-15
ENSMUSG00000032114	Slc37a4	1936.8		-0.142679	0.273504	-0.521673	0.601898	0.772984		-3.02383	0.366158	-8.25826	1.47808e-16	5.3073e-14		-2.88115	0.366293	-7.86569	3.6706e-15	8.61406e-13
ENSMUSG00000032648	Pygm	48135.7		0.864992	0.23105	3.74374	0.000181298	0.0022318		-1.38964	0.305746	-4.54509	5.4911e-06	0.00024646		-2.25464	0.305739	-7.37438	1.65111e-13	3.04097e-11
ENSMUSG00000033044	Dhrs7c	2471.26		0.512491	0.25641	1.99872	0.045639	0.144216		-1.49368	0.340851	-4.38222	1.17479e-05	0.000468699		-2.00617	0.340813	-5.88643	3.94627e-09	3.07049e-07
ENSMUSG00000033065	Pfkm	35604.8		0.334876	0.222108	1.50771	0.131628	0.297397		-1.05109	0.293913	-3.57621	0.000348613	0.00775738		-1.38597	0.293914	-4.71557	2.41037e-06	8.70245e-05
ENSMUSG00000033808	Tmem87a	1223.78		-0.122307	0.166156	-0.736097	0.461672	0.664524		-1.07198	0.224015	-4.7853	1.70735e-06	8.48252e-05		-0.949673	0.224533	-4.22954	2.34167e-05	0.000618355
ENSMUSG00000034055	Phka1	5743.11		0.699519	0.242565	2.88384	0.00392856	0.0249423		-1.73454	0.322191	-5.38359	7.30151e-08	5.29158e-06		-2.43406	0.322144	-7.55581	4.1625e-14	8.07524e-12
ENSMUSG00000034127	Tspan8	1057.61		-0.0614889	0.337866	-0.181992	0.855589	0.9278		-4.16978	0.462715	-9.01155	2.03171e-19	1.10686e-16		-4.10829	0.462884	-8.87543	6.96627e-19	3.16748e-16
ENSMUSG00000034614	Pik3ip1	441.825		-0.680304	0.198299	-3.43069	0.000602049	0.00585609		-2.00749	0.273799	-7.33197	2.26795e-13	4.90084e-11		-1.32718	0.275895	-4.81046	1.50581e-06	5.78089e-05
ENSMUSG00000034714	Ttyh2	238.697		0.235487	0.292828	0.804182	0.421292	0.628397		-1.45937	0.400957	-3.63971	0.000272942	0.00639794		-1.69486	0.401262	-4.22381	2.40202e-05	0.000628585
ENSMUSG00000034751	Mast4	305.73		0.764362	0.219432	3.48336	0.00049516	0.00503927		-1.0828	0.307544	-3.52081	0.00043023	0.00919261		-1.84717	0.306443	-6.02775	1.66253e-09	1.45722e-07
ENSMUSG00000034842	Art3	2811.24		-0.491494	0.211263	-2.32646	0.0199942	0.0819315		-1.19219	0.280716	-4.24695	2.16701e-05	0.000771096		-0.700694	0.281038	-2.49323	0.0126585	0.0909538
ENSMUSG00000034981	Parm1	261.979		0.679987	0.319718	2.12683	0.0334338	0.117084		-3.04274	0.465822	-6.53199	6.4903e-11	9.15538e-09		-3.72273	0.46527	-8.00122	1.23194e-15	3.25905e-13
ENSMUSG00000035275	Raver2	115.058		-0.830841	0.321149	-2.58709	0.00967914	0.0487417		-2.42874	0.467366	-5.19665	2.02913e-07	1.27722e-05		-1.5979	0.473376	-3.37553	0.000736725	0.0105505
ENSMUSG00000035606	Ky	1644.98		0.993182	0.303516	3.27226	0.00106693	0.00924255		-1.91153	0.404859	-4.72147	2.34148e-06	0.000112175		-2.90471	0.404672	-7.17795	7.07641e-13	1.18347e-10
ENSMUSG00000036390	Gadd45a	180.261		0.451779	0.265455	1.70191	0.0887731	0.227887		-2.04634	0.380002	-5.38507	7.24156e-08	5.27232e-06		-2.49812	0.379755	-6.57822	4.76098e-11	5.97174e-09
ENSMUSG00000036879	Phkb	7719.22		0.676123	0.273657	2.4707	0.0134849	0.0619123		-1.50116	0.362577	-4.14024	3.46942e-05	0.00115397		-2.17728	0.362553	-6.00541	1.9085e-09	1.64312e-07
ENSMUSG00000037493	Cib2	810.176		1.12513	0.348528	3.22823	0.00124559	0.0104021		-2.9289	0.473184	-6.18978	6.02466e-10	6.60997e-08		-4.05403	0.472815	-8.57425	9.97338e-18	3.81875e-15
ENSMUSG00000037685	Atp8a1	1392.25		-0.396195	0.242425	-1.6343	0.102195	0.251575		-2.46697	0.325383	-7.58175	3.40912e-14	7.89366e-12		-2.07078	0.32575	-6.35696	2.0579e-10	2.21795e-08
ENSMUSG00000037904	Ankrd9	918.52		0.579586	0.201017	2.88326	0.00393582	0.0249779		-1.21369	0.273162	-4.44312	8.86637e-06	0.000368373		-1.79328	0.272917	-6.57078	5.00516e-11	6.22086e-09
ENSMUSG00000037977	6430571L13Rik	438.806		0.259541	0.257559	1.0077	0.3136	0.525405		-2.44151	0.357177	-6.83556	8.16865e-12	1.3169e-09		-2.70105	0.357312	-7.55935	4.05078e-14	7.96472e-12
ENSMUSG00000038127	Ccdc50	2535.35		-0.332089	0.200796	-1.65386	0.0981552	0.244785		-1.00075	0.266807	-3.75083	0.000176251	0.00444823		-0.668657	0.267094	-2.50345	0.0122989	0.0889533
ENSMUSG00000038205	Prkab2	3008.74		0.643276	0.270547	2.37769	0.0174216	0.0745082		-2.22421	0.359947	-6.17927	6.44002e-10	7.01696e-08		-2.86748	0.3599	-7.96744	1.6199e-15	3.99484e-13
ENSMUSG00000038670	Mybpc2	44695.3		0.517245	0.638555	0.810024	0.417926	0.624913		-3.77177	0.844901	-4.46415	8.03862e-06	0.000338672		-4.28901	0.844901	-5.07635	3.84752e-07	1.72624e-05
ENSMUSG00000039081	Zfp503	88.8437		0.876696	0.362726	2.41696	0.0156506	0.0691963		-2.00079	0.52684	-3.79772	0.00014603	0.00385809		-2.87749	0.524798	-5.48305	4.18058e-08	2.46265e-06
ENSMUSG00000039478	Micu3	356.086		-0.140418	0.19852	-0.707322	0.479366	0.678599		-2.2017	0.281574	-7.81928	5.3125e-15	1.39887e-12		-2.06129	0.282621	-7.29345	3.02111e-13	5.42682e-11
ENSMUSG00000040164	Kcns1	6.43896		-4.90577	1.31232	-3.73824	0.000185314	NA		-7.33157	1.8886	-3.88202	0.000103592	0.0028916		-2.4258	2.10312	-1.15343	0.248734	NA
ENSMUSG00000040774	Cept1	447.959		-0.133205	0.243275	-0.547547	0.584003	0.759875		-1.36577	0.328902	-4.15251	3.28847e-05	0.0010984		-1.23256	0.329697	-3.73847	0.000185143	0.00342727
ENSMUSG00000040990	Sh3kbp1	418.473		-0.368746	0.193806	-1.90266	0.0570853	0.168818		-2.16338	0.273126	-7.92084	2.35919e-15	6.42637e-13		-1.79464	0.274646	-6.53436	6.38838e-11	7.6819e-09
ENSMUSG00000041460	Cacna2d4	117.587		0.42166	0.364396	1.15715	0.247212	0.45119		-4.20127	0.648772	-6.47573	9.43526e-11	1.30761e-08		-4.62293	0.648601	-7.12754	1.02178e-12	1.67043e-10
ENSMUSG00000042249	Grk3	81.6071		0.213345	0.275116	0.775471	0.438062	0.644236		-1.39145	0.396242	-3.51162	0.00044538	0.00942347		-1.6048	0.39717	-4.04058	5.33188e-05	0.00121597
ENSMUSG00000042429	Adora1	25.2626		0.352775	0.679699	0.519017	0.603749	0.774426		-4.81384	1.2339	-3.90131	9.56723e-05	0.00271369		-5.16662	1.23395	-4.18704	2.8261e-05	0.000725217
ENSMUSG00000042451	Mybph	455.747		0.113403	0.819978	0.1383	0.890003	0.945987		-6.82638	1.14679	-5.95263	2.63875e-09	2.49638e-07		-6.93978	1.14684	-6.05121	1.43763e-09	1.26772e-07
ENSMUSG00000042717	Ppp1r3a	19187.5		0.451513	0.209059	2.15974	0.0307931	0.110855		-1.04934	0.276825	-3.7906	0.000150281	0.003944		-1.50085	0.276821	-5.42173	5.90236e-08	3.32866e-06
ENSMUSG00000042961	Egflam	419.732		-0.0708076	0.209616	-0.337797	0.735516	0.859933		-1.32467	0.285199	-4.64473	3.40523e-06	0.000159169		-1.25386	0.286032	-4.38366	1.16703e-05	0.000340286
ENSMUSG00000043004	Gng2	75.3395		-0.830856	0.266038	-3.12307	0.00178975	0.0137507		-1.62041	0.385644	-4.20182	2.64776e-05	0.00091336		-0.789552	0.395769	-1.99498	0.046045	0.218582
ENSMUSG00000043557	Mdga1	47.2218		0.841884	0.359955	2.33886	0.0193427	0.0799743		-3.87335	0.696348	-5.56238	2.66115e-08	2.09172e-06		-4.71524	0.69421	-6.79224	1.10409e-11	1.54466e-09
ENSMUSG00000043719	Col6a6	154.538		-0.970659	0.349786	-2.77501	0.00551998	0.0319214		-2.17039	0.502555	-4.31871	1.56947e-05	0.000597947		-1.19973	0.509865	-2.35303	0.018621	0.118981
ENSMUSG00000043953	Ccrl2	86.4282		-0.164745	0.321816	-0.511924	0.608704	0.777786		-1.79191	0.465586	-3.84872	0.000118737	0.0032275		-1.62716	0.468645	-3.47206	0.000516479	0.00797861
ENSMUSG00000044461	Shisa2	1600.95		0.211512	0.315276	0.670879	0.502298	0.697949		-1.53184	0.419487	-3.65169	0.000260525	0.00618953		-1.74335	0.419546	-4.15532	3.24827e-05	0.000810675
ENSMUSG00000044768	D1Ertd622e	297.416		-0.114901	0.23071	-0.498034	0.61846	0.784595		-2.07275	0.329092	-6.29838	3.00776e-10	3.83222e-08		-1.95785	0.330349	-5.92659	3.09288e-09	2.45909e-07
ENSMUSG00000045576	St7l	277.621		-0.221093	0.204858	-1.07925	0.280477	0.489264		-1.08658	0.283645	-3.83079	0.000127732	0.00343205		-0.86549	0.285628	-3.03013	0.00244451	0.0273176
ENSMUSG00000046312	Myorg	1864.37		0.598998	0.245645	2.43847	0.0147495	0.0661568		-1.27344	0.326708	-3.89779	9.70744e-05	0.00273871		-1.87244	0.326631	-5.73259	9.89107e-09	6.70856e-07
ENSMUSG00000046345	Smco1	1031.99		0.291572	0.264648	1.10174	0.270576	0.478197		-1.51708	0.354546	-4.27893	1.87791e-05	0.000692428		-1.80865	0.354595	-5.10061	3.38565e-07	1.5589e-05
ENSMUSG00000046500	Tafa4	10.4712		-1.21526	0.701008	-1.73359	0.08299	0.217337		-6.40052	1.69283	-3.78097	0.000156217	0.00403281		-5.18526	1.71276	-3.02744	0.00246639	NA
ENSMUSG00000046798	Cldn12	478.591		-0.195544	0.201794	-0.969026	0.332532	0.543845		-1.00665	0.272835	-3.6896	0.00022461	0.00547465		-0.811109	0.273918	-2.96114	0.00306501	0.0323628
ENSMUSG00000046818	Ddit4l	2730.46		0.465985	0.216371	2.15364	0.0312688	0.111957		-1.93351	0.288966	-6.69113	2.2146e-11	3.33223e-09		-2.39949	0.288937	-8.30456	1.00194e-16	3.2396e-14
ENSMUSG00000047591	Mafa	98.8292		-0.208596	0.35767	-0.583209	0.559752	0.74213		-3.6785	0.621308	-5.92058	3.20804e-09	2.9814e-07		-3.46991	0.623993	-5.56082	2.68518e-08	1.64849e-06
ENSMUSG00000047604	Frat2	174.519		0.585343	0.264667	2.21162	0.0269932	0.101023		-1.34039	0.374517	-3.579	0.000344916	0.00768594		-1.92574	0.373708	-5.15305	2.56289e-07	1.22919e-05
ENSMUSG00000047909	Ankrd16	125.817		-0.550642	0.251577	-2.18877	0.0286139	0.105257		-1.40417	0.351482	-3.99499	6.46973e-05	0.00194696		-0.853524	0.356448	-2.39453	0.0166418	0.110013
ENSMUSG00000047996	Prrg1	150.346		-0.205177	0.268129	-0.76522	0.444141	0.649963		-1.3385	0.370225	-3.61536	0.00029993	0.00689752		-1.13332	0.37254	-3.04214	0.00234902	0.0264948
ENSMUSG00000048578	Mlec	2233.34		0.103773	0.248515	0.417575	0.676258	0.823559		-1.47923	0.33026	-4.479	7.49925e-06	0.000321958		-1.58301	0.330335	-4.79213	1.65021e-06	6.20427e-05
ENSMUSG00000049588	Ccdc69	101.795		-0.0417827	0.269618	-0.15497	0.876845	0.93884		-2.03496	0.406329	-5.00816	5.49532e-07	3.07875e-05		-1.99318	0.408542	-4.87876	1.06755e-06	4.32672e-05
ENSMUSG00000050069	Grem2	33.8534		0.766979	0.440898	1.73958	0.0819324	0.215423		-3.6423	0.872241	-4.1758	2.96945e-05	0.00100459		-4.40928	0.869635	-5.07026	3.97267e-07	1.76393e-05
ENSMUSG00000050592	Fam78a	89.163		0.830016	0.347644	2.38755	0.0169612	0.0732727		-2.30823	0.529758	-4.35714	1.31774e-05	0.0005166		-3.13824	0.527679	-5.94726	2.72665e-09	2.17982e-07
ENSMUSG00000050628	Ubald2	371.015		0.404505	0.205488	1.96851	0.0490093	0.151676		-1.03824	0.281648	-3.68631	0.000227529	0.0055134		-1.44275	0.28156	-5.12412	2.98936e-07	1.39408e-05
ENSMUSG00000051043	Gprc5c	888.009		0.240563	0.276469	0.870128	0.384231	0.592773		-1.74966	0.370485	-4.72261	2.3284e-06	0.000112154		-1.99022	0.370567	-5.37074	7.84126e-08	4.24127e-06
ENSMUSG00000051373	Plpp7	1525.56		0.34468	0.226117	1.52434	0.127424	0.291318		-1.64932	0.302638	-5.44979	5.04292e-08	3.79395e-06		-1.994	0.302648	-6.5885	4.44305e-11	5.71556e-09
ENSMUSG00000052373	Mpp3	251.877		-0.0289859	0.279687	-0.103637	0.917457	0.960501		-1.38459	0.381962	-3.62494	0.000289025	0.00671684		-1.35561	0.382928	-3.5401	0.000399968	0.00648835
ENSMUSG00000052852	Reep1	1249.68		-0.0563961	0.249359	-0.226164	0.821074	0.909575		-2.2434	0.333793	-6.72093	1.80567e-11	2.79684e-09		-2.187	0.333979	-6.54832	5.81888e-11	7.05539e-09
ENSMUSG00000053317	Sec61b	167.373		-0.386389	0.250505	-1.54244	0.122967	0.284782		-1.47436	0.342496	-4.30475	1.67172e-05	0.000630347		-1.08797	0.345132	-3.15234	0.00161969	0.0200737
ENSMUSG00000053604	Rpia	326.024		-0.200712	0.172993	-1.16023	0.245956	0.449709		-1.0772	0.24123	-4.46545	7.98996e-06	0.000338427		-0.87649	0.243095	-3.60554	0.000311503	0.00529482
ENSMUSG00000055214	Pld5	36.5225		-0.218116	0.507562	-0.429733	0.66739	0.817979		-4.45983	0.918652	-4.85475	1.20537e-06	6.24382e-05		-4.24171	0.921484	-4.60313	4.16182e-06	0.000137312
ENSMUSG00000055435	Maf	503.059		0.441519	0.26556	1.6626	0.096393	0.241923		-2.08898	0.366812	-5.69495	1.23409e-08	1.04825e-06		-2.5305	0.366707	-6.9006	5.17827e-12	7.68815e-10
ENSMUSG00000055775	Myh8	18715.8		0.49096	0.227855	2.1547	0.0311853	0.111816		-1.2719	0.301746	-4.21512	2.49644e-05	0.000872593		-1.76285	0.301739	-5.84231	5.14814e-09	3.80231e-07
ENSMUSG00000057003	Myh4	682472		0.338797	0.664338	0.509976	0.610068	0.778437		-4.85847	0.87886	-5.52814	3.23638e-08	2.50345e-06		-5.19726	0.878861	-5.91364	3.34637e-09	2.64618e-07
ENSMUSG00000058013	Septin11	1233.97		0.180974	0.244363	0.740594	0.45894	0.661721		-1.13951	0.325365	-3.50226	0.000461329	0.00969221		-1.32049	0.325465	-4.05722	4.96593e-05	0.00115017
ENSMUSG00000059811	Atl2	3282.9		0.0725296	0.207688	0.349223	0.726922	0.853571		-1.24764	0.276092	-4.51893	6.21528e-06	0.000273524		-1.32017	0.276176	-4.78018	1.75138e-06	6.5508e-05
ENSMUSG00000060180	Myh13	1989.6		0.454455	0.224699	2.0225	0.0431243	0.139198		-1.256	0.300329	-4.1821	2.88833e-05	0.000979244		-1.71046	0.300284	-5.69614	1.22548e-08	8.10489e-07
ENSMUSG00000060600	Eno3	79894.3		0.586319	0.267541	2.19151	0.0284148	0.104824		-1.48774	0.353973	-4.20297	2.63434e-05	0.000910722		-2.07406	0.353971	-5.85939	4.64558e-09	3.52048e-07
ENSMUSG00000061126	Cyp4f39	144.312		-0.272942	0.461438	-0.591504	0.554183	0.738165		-5.15813	0.708221	-7.28321	3.25968e-13	6.68826e-11		-4.88518	0.709054	-6.88972	5.59023e-12	8.21595e-10
ENSMUSG00000062070	Pgk1	15878.7		0.571327	0.232655	2.45568	0.0140619	0.0639327		-1.11105	0.308015	-3.60712	0.00030962	0.00705975		-1.68237	0.308005	-5.46215	4.70391e-08	2.71595e-06
ENSMUSG00000062184	Hs6st2	76.123		-0.706498	0.335618	-2.10507	0.0352854	0.121339		-1.79158	0.476818	-3.75737	0.000171708	0.0043755		-1.08508	0.484113	-2.24139	0.0250008	0.144637
ENSMUSG00000064797	Gm24357	58.1777		-1.14677	0.525993	-2.1802	0.0292427	0.106923		-2.89898	0.765206	-3.7885	0.000151558	0.0039578		-1.75221	0.775121	-2.26057	0.023786	0.140457
ENSMUSG00000065265	Gm23455	99.1605		-1.06887	0.394355	-2.71043	0.00671969	0.0367043		-2.47192	0.560143	-4.41302	1.0194e-05	0.000415092		-1.40305	0.567327	-2.47309	0.013395	0.0946103
ENSMUSG00000067276	Capn6	120.924		-0.790861	0.300506	-2.63176	0.00849428	0.0440206		-1.53705	0.424027	-3.62488	0.000289098	0.00671684		-0.746187	0.431241	-1.73032	0.0835724	0.31782
ENSMUSG00000068606	Gm4841	98.1025		-0.243865	0.341756	-0.713565	0.475496	0.675467		-3.06458	0.586867	-5.22194	1.7706e-07	1.13714e-05		-2.82072	0.590693	-4.77527	1.7947e-06	6.6785e-05
ENSMUSG00000068614	Actc1	2830.7		-1.175	0.903705	-1.3002	0.193531	0.381382		-4.40731	1.19671	-3.68285	0.000230641	0.00556321		-3.23231	1.19678	-2.70083	0.00691664	0.0586122
ENSMUSG00000068697	Myoz1	16640.1		0.522096	0.245261	2.12874	0.0332759	0.11684		-1.9941	0.324877	-6.138	8.35644e-10	8.68575e-08		-2.51619	0.32487	-7.74522	9.5418e-15	2.10353e-12
ENSMUSG00000068747	Sort1	667.73		0.600717	0.322489	1.86275	0.0624969	0.179309		-1.90906	0.433736	-4.40143	1.0754e-05	0.000433426		-2.50977	0.433564	-5.7887	7.09335e-09	5.01011e-07
ENSMUSG00000070385	Ampd1	11606.4		-0.0873429	0.201638	-0.433167	0.664893	0.816468		-1.78814	0.267143	-6.6936	2.17752e-11	3.30794e-09		-1.7008	0.267172	-6.36593	1.94104e-10	2.10762e-08
ENSMUSG00000073139	Tmem185a	397.775		0.37053	0.245546	1.509	0.131298	0.29705		-1.3495	0.332813	-4.05483	5.01701e-05	0.00157896		-1.72003	0.332803	-5.16831	2.36222e-07	1.13809e-05
ENSMUSG00000074217	Misp3	27.2753		0.354535	0.491806	0.720885	0.47098	0.672499		-3.23997	0.926439	-3.49723	0.00047012	0.0098507		-3.59451	0.92653	-3.87953	0.000104657	0.00212675
ENSMUSG00000075289	Carns1	95.4616		-0.913788	0.30181	-3.02769	0.00246433	0.0175393		-2.52096	0.432602	-5.82742	5.62895e-09	5.08182e-07		-1.60717	0.438747	-3.66309	0.000249191	0.00440551
ENSMUSG00000079278	Tmem233	1684.24		0.869386	0.34785	2.49931	0.0124434	0.0584208		-3.3381	0.46771	-7.13712	9.53082e-13	1.85898e-10		-4.20748	0.467586	-8.99831	2.29215e-19	1.11169e-16
ENSMUSG00000084843	B230312C02Rik	206.269		0.612608	0.491281	1.24696	0.212413	0.40617		-3.7213	0.684533	-5.43626	5.44108e-08	4.03585e-06		-4.33391	0.684292	-6.33342	2.3978e-10	2.50993e-08
ENSMUSG00000084998	Gm16279	51.5987		-0.653066	0.440784	-1.4816	0.138447	0.307223		-2.37076	0.659846	-3.5929	0.000327023	0.00738091		-1.71769	0.668175	-2.57072	0.0101486	0.0774521
ENSMUSG00000085348	Myhas	652.886		0.0585617	0.279922	0.209207	0.834287	0.915973		-2.26625	0.375945	-6.02814	1.6586e-09	1.6276e-07		-2.32481	0.376149	-6.18055	6.38794e-10	6.12515e-08
ENSMUSG00000086866	4930512H18Rik	21.3476		-2.3526	0.780504	-3.01421	0.00257646	0.0181838		-4.82475	1.28462	-3.75579	0.000172794	0.00438902		-2.47214	1.31276	-1.88317	0.0596774	0.259214
ENSMUSG00000087410	2310065F04Rik	1102.56		-0.167353	0.407897	-0.410283	0.681599	0.827406		-3.3615	0.549829	-6.11372	9.73334e-10	1.00508e-07		-3.19415	0.550077	-5.80673	6.37053e-09	4.52152e-07
ENSMUSG00000087523	Gm12319	233.665		0.453614	0.316918	1.43133	0.152336	0.326664		-2.89615	0.460422	-6.2902	3.1705e-10	3.97546e-08		-3.34976	0.460242	-7.27827	3.38131e-13	5.98147e-11
ENSMUSG00000089671	Gm16537	17.4359		0.475161	0.550065	0.863828	0.387682	0.595957		-2.85269	0.807976	-3.53066	0.000414523	0.00892403		-3.32785	0.806882	-4.12433	3.71814e-05	0.000901648
ENSMUSG00000090799	Klhl33	882.619		0.095817	0.305296	0.31385	0.753635	0.87076		-2.05858	0.407301	-5.05419	4.3221e-07	2.45629e-05		-2.15439	0.407427	-5.2878	1.23795e-07	6.47917e-06
ENSMUSG00000091089	NA	616.065		0.141995	0.250827	0.566109	0.57132	0.750516		-1.75758	0.337601	-5.20607	1.92883e-07	1.22384e-05		-1.89957	0.337808	-5.62323	1.87424e-08	1.19606e-06
ENSMUSG00000097667	NA	176.044		0.519856	0.488317	1.06459	0.287063	0.496704		-2.90401	0.679591	-4.27318	1.92706e-05	0.000706395		-3.42387	0.679333	-5.04005	4.65409e-07	2.02141e-05
ENSMUSG00000097705	Gm26740	151.75		-0.628285	0.34107	-1.8421	0.0654607	0.184663		-2.03596	0.477815	-4.26099	2.03528e-05	0.00073582		-1.40768	0.481659	-2.92256	0.00347167	0.0354228
ENSMUSG00000101655	2310040G24Rik	1104.73		0.143377	0.241367	0.59402	0.552498	0.736912		-1.20361	0.321083	-3.74859	0.000177834	0.00446677		-1.34698	0.3212	-4.1936	2.74568e-05	0.000707073
ENSMUSG00000102573	Gm7265	516.93		0.00802239	0.436921	0.0183612	0.985351	0.993139		-2.37047	0.588185	-4.03015	5.57405e-05	0.00171665		-2.3785	0.588502	-4.04161	5.30856e-05	0.00121255
ENSMUSG00000107019	Gm43682	31.9094		0.216946	0.392868	0.552212	0.580803	0.758055		-2.21891	0.590761	-3.75603	0.00017263	0.00438902		-2.43586	0.591999	-4.11464	3.87785e-05	0.000932039
ENSMUSG00000107043	Gm42849	22.3657		-1.80136	3.73913	-0.481758	0.629978	0.792972		-19.2817	5.14462	-3.74793	0.000178298	0.00447131		-17.4803	5.15599	-3.3903	0.00069816	0.0101684
ENSMUSG00000001403	Ube2c	1565.81		0.612195	0.210377	2.90999	0.00361441	0.0233284		-0.906736	0.279492	-3.24423	0.00117768	0.0206362		-1.51893	0.279375	-5.43688	5.42208e-08	3.0697e-06
ENSMUSG00000002266	Zim1	41.2407		0.307838	0.445035	0.691715	0.489116	0.686805		-2.0394	0.659812	-3.09088	0.00199563	0.03076		-2.34724	0.660217	-3.55525	0.000377616	0.00620125
ENSMUSG00000002870	Mcm2	65.2495		0.483038	0.296447	1.62943	0.103223	0.253354		-1.10804	0.431037	-2.57064	0.010151	0.101956		-1.59108	0.430107	-3.69927	0.000216225	0.00392405
ENSMUSG00000010592	Dazl	10.8102		1.88203	0.6269	3.00211	0.00268113	0.0187596		-3.93461	1.58427	-2.48355	0.0130082	0.120044		-5.81664	1.56835	-3.70875	0.000208282	0.00379762
ENSMUSG00000015733	Capza2	6009.43		0.286409	0.204967	1.39734	0.162311	0.339571		-0.766493	0.271674	-2.82137	0.00478195	0.0598179		-1.0529	0.271687	-3.87543	0.000106439	0.00215694
ENSMUSG00000018293	Pfn1	619.017		0.409676	0.221603	1.8487	0.0645016	0.183256		-0.888694	0.299046	-2.97177	0.00296091	0.0410708		-1.29837	0.298982	-4.34263	1.40785e-05	0.000397751
ENSMUSG00000018334	Ksr1	255.932		0.449048	0.288082	1.55875	0.119055	0.278358		-1.02771	0.392636	-2.61746	0.00885866	0.0925648		-1.47676	0.392431	-3.7631	0.000167817	0.00314657
ENSMUSG00000020364	Zfp354a	97.3614		0.249878	0.2627	0.95119	0.341508	0.551457		-1.23825	0.378944	-3.26764	0.00108447	0.0192729		-1.48813	0.379635	-3.9199	8.85855e-05	0.00185274
ENSMUSG00000020475	Pgam2	10192.3		0.589637	0.239428	2.46269	0.0137899	0.0629315		-1.00362	0.317126	-3.16474	0.00155221	0.0254921		-1.59326	0.317109	-5.02434	5.05172e-07	2.17463e-05
ENSMUSG00000020513	Tubd1	143.562		0.250862	0.244832	1.02463	0.305539	0.516688		-0.953846	0.34603	-2.75654	0.00584158	0.0690846		-1.20471	0.346618	-3.47561	0.0005097	0.00791476
ENSMUSG00000020919	Stat5b	3751.79		0.520254	0.312758	1.66344	0.0962237	0.241698		-1.13874	0.414264	-2.74882	0.00598103	0.070413		-1.65899	0.414245	-4.00486	6.20536e-05	0.00137844
ENSMUSG00000021275	Tecpr2	139.263		0.579877	0.240359	2.41255	0.0158413	0.0698094		-0.985409	0.348346	-2.82883	0.0046719	0.0590019		-1.56529	0.347174	-4.50865	6.52408e-06	0.000203703
ENSMUSG00000021281	Tnfaip2	1173.01		0.584672	0.396818	1.4734	0.140643	0.309966		-1.33777	0.527822	-2.53452	0.0112603	0.109276		-1.92244	0.527727	-3.64288	0.000269608	0.00468113
ENSMUSG00000022257	Laptm4b	363.731		0.545483	0.196291	2.77895	0.00545341	0.0316686		-0.968706	0.271951	-3.56207	0.000367947	0.008119		-1.51419	0.2715	-5.57713	2.44518e-08	1.51393e-06
ENSMUSG00000022389	Tef	3097.49		0.405959	0.237023	1.71274	0.0867601	0.224237		-0.904339	0.314393	-2.87646	0.00402164	0.0523808		-1.3103	0.314383	-4.16784	3.07502e-05	0.000776897
ENSMUSG00000022747	St3gal6	1655.75		0.554845	0.269106	2.06181	0.0392258	0.130329		-1.00226	0.357942	-2.80005	0.00510949	0.0627233		-1.5571	0.357865	-4.35108	1.35466e-05	0.000385475
ENSMUSG00000022803	Popdc2	569.034		0.410915	0.215203	1.90943	0.0562063	0.166788		-0.866548	0.29013	-2.98675	0.00281957	0.039632		-1.27746	0.290064	-4.40407	1.0624e-05	0.000314826
ENSMUSG00000023232	Serinc2	285.496		0.662273	0.251024	2.63829	0.0083326	0.0433455		-1.01541	0.345458	-2.93931	0.00328941	0.0446473		-1.67768	0.344699	-4.8671	1.1325e-06	4.53903e-05
ENSMUSG00000023915	Tnfrsf21	364.759		0.649165	0.275581	2.35562	0.0184917	0.0777698		-1.03318	0.3716	-2.78034	0.00543015	0.0653894		-1.68234	0.371155	-4.53272	5.82292e-06	0.000183782
ENSMUSG00000025035	Arl3	602.801		0.36466	0.220452	1.65415	0.0980976	0.244784		-0.830942	0.296267	-2.80471	0.00503622	0.0623659		-1.1956	0.296267	-4.03556	5.44721e-05	0.00123839
ENSMUSG00000025154	Arhgap19	191.364		0.41895	0.234169	1.78909	0.0735999	0.199822		-0.781237	0.326229	-2.39475	0.0166316	0.142217		-1.20019	0.326009	-3.68145	0.000231908	0.00416062
ENSMUSG00000025816	Sec61a2	162.364		0.40135	0.235728	1.7026	0.0886432	0.227708		-1.09935	0.333701	-3.29441	0.000986271	0.0178694		-1.5007	0.333539	-4.49931	6.81728e-06	0.000211948
ENSMUSG00000025997	Ikzf2	363.137		0.180423	0.194547	0.9274	0.353719	0.563309		-0.870662	0.266298	-3.26951	0.00107735	0.0192328		-1.05108	0.266762	-3.94015	8.14299e-05	0.00173471
ENSMUSG00000026473	Glul	5951.69		0.581255	0.292753	1.98548	0.0470911	0.147454		-1.09343	0.387887	-2.81896	0.00481802	0.060205		-1.67469	0.387862	-4.31775	1.57631e-05	0.000436118
ENSMUSG00000026643	Nmt2	327.247		0.167459	0.198207	0.844868	0.398185	0.605477		-0.935644	0.274928	-3.40323	0.000665938	0.0132023		-1.1031	0.275523	-4.00368	6.23656e-05	0.00138326
ENSMUSG00000027313	Chac1	249.363		1.1582	0.43739	2.64798	0.00809733	0.0424271		-2.08988	0.616928	-3.38756	0.00070517	0.0138226		-3.24809	0.614975	-5.28165	1.28025e-07	6.65272e-06
ENSMUSG00000027827	Kcnab1	66.9317		0.106037	0.374064	0.283474	0.776814	0.884406		-1.85846	0.547305	-3.39567	0.000684619	0.0135035		-1.9645	0.548927	-3.5788	0.00034517	0.0057525
ENSMUSG00000028161	Ppp3ca	3182.01		0.514457	0.221281	2.3249	0.0200772	0.0820941		-0.859075	0.293516	-2.92684	0.00342424	0.0460422		-1.37353	0.293482	-4.68012	2.8671e-06	0.000100521
ENSMUSG00000028334	Nans	196.374		0.279662	0.210487	1.32864	0.183966	0.368417		-0.756074	0.296812	-2.54731	0.0108556	0.106791		-1.03574	0.297208	-3.48488	0.000492356	0.00769472
ENSMUSG00000028444	Cntfr	28.696		0.981118	0.568763	1.725	0.0845271	0.219927		-2.17309	0.890088	-2.44144	0.0146289	0.13021		-3.15421	0.884658	-3.56546	0.000363219	0.00599868
ENSMUSG00000028496	Mllt3	1532.59		0.175249	0.201385	0.870218	0.384181	0.592773		-0.962047	0.268491	-3.58316	0.000339458	0.00759647		-1.1373	0.2686	-4.23416	2.29407e-05	0.000613112
ENSMUSG00000028525	Pde4b	546.932		0.360177	0.191992	1.876	0.0606553	0.175679		-0.658087	0.26095	-2.52189	0.0116725	0.1121		-1.01826	0.260958	-3.90202	9.53919e-05	0.00196507
ENSMUSG00000028527	Ak4	127.831		0.248186	0.256486	0.967638	0.333225	0.54405		-1.1041	0.352327	-3.13374	0.00172592	0.027796		-1.35229	0.352821	-3.83279	0.000126699	0.00249454
ENSMUSG00000028584	Lrrc38	166.595		0.689269	0.336276	2.04971	0.0403925	0.132938		-1.428	0.463503	-3.08089	0.00206386	0.0315042		-2.11727	0.462629	-4.57661	4.7258e-06	0.000153375
ENSMUSG00000029472	Anapc5	7110.49		0.528433	0.232184	2.27592	0.0228508	0.0898519		-1.03294	0.307541	-3.35871	0.000783062	0.0148697		-1.56137	0.307525	-5.07722	3.82989e-07	1.72624e-05
ENSMUSG00000030451	Herc2	2237.26		0.409458	0.211184	1.93886	0.052518	0.158968		-0.687978	0.280378	-2.45375	0.0141374	0.127487		-1.09744	0.280361	-3.91437	9.06423e-05	0.00188676
ENSMUSG00000030701	Plekhb1	258.312		0.64083	0.276919	2.31415	0.0206597	0.0838883		-1.15285	0.376757	-3.05992	0.00221396	0.0330609		-1.79368	0.376187	-4.76804	1.86024e-06	6.88713e-05
ENSMUSG00000030727	Rabep2	259.639		0.572863	0.296382	1.93285	0.0532543	0.160463		-0.968451	0.398299	-2.43147	0.0150379	0.13258		-1.54131	0.397856	-3.87405	0.000107042	0.00216614
ENSMUSG00000032415	Ube2cbp	38.1916		0.627003	0.419654	1.49409	0.135151	0.302567		-1.50586	0.603356	-2.4958	0.0125673	0.117209		-2.13286	0.60137	-3.54666	0.000390141	0.006371
ENSMUSG00000032523	Hhatl	648.579		0.471353	0.178372	2.64253	0.00822903	0.0429245		-0.6878	0.241196	-2.85163	0.00434962	0.0555984		-1.15915	0.241028	-4.80921	1.5153e-06	5.80201e-05
ENSMUSG00000032577	Mapkapk3	489.731		0.462887	0.256823	1.80236	0.0714885	0.19595		-0.888429	0.344871	-2.57612	0.00999152	0.100802		-1.35132	0.344737	-3.91984	8.86066e-05	0.00185274
ENSMUSG00000032849	Abcc4	259.974		0.226677	0.217063	1.04429	0.296351	0.507179		-0.884663	0.298584	-2.96286	0.00304797	0.04202		-1.11134	0.299015	-3.71667	0.000201864	0.00368523
ENSMUSG00000033257	Ttll4	209.022		0.475324	0.26466	1.79598	0.0724975	0.197627		-0.924283	0.3674	-2.51574	0.0118784	0.113052		-1.39961	0.367007	-3.81357	0.000136973	0.00265373
ENSMUSG00000034164	Emid1	58.8308		0.529444	0.338563	1.5638	0.117865	0.276448		-1.69085	0.508457	-3.32545	0.000882771	0.0163374		-2.22029	0.507322	-4.3765	1.20603e-05	0.000348987
ENSMUSG00000036427	Gpi1	5667.54		0.390223	0.221879	1.75872	0.0786256	0.208943		-0.685837	0.293944	-2.33322	0.0196364	0.15724		-1.07606	0.29394	-3.66081	0.000251417	0.00443946
ENSMUSG00000036438	Calm2	3683.11		0.284017	0.148451	1.91321	0.0557215	0.165788		-0.762083	0.19791	-3.85066	0.000117802	0.00321443		-1.0461	0.197942	-5.28487	1.25796e-07	6.56032e-06
ENSMUSG00000036764	Dnajc12	169.221		0.127418	0.246832	0.516215	0.605705	0.776264		-1.18216	0.341329	-3.46339	0.000533416	0.0110307		-1.30957	0.342193	-3.82701	0.000129709	0.00253366
ENSMUSG00000036833	Pnpla7	457.767		0.252142	0.183445	1.37449	0.169291	0.348828		-0.921427	0.249785	-3.68889	0.000225237	0.00547465		-1.17357	0.250014	-4.69402	2.67891e-06	9.48372e-05
ENSMUSG00000038280	Ostm1	749.578		0.185185	0.203048	0.912027	0.361754	0.570375		-0.838209	0.272413	-3.07698	0.00209108	0.0318582		-1.02339	0.272626	-3.75383	0.00017415	0.00325691
ENSMUSG00000039105	Atp6v1g1	2320.53		0.291733	0.221856	1.31497	0.188521	0.374562		-0.722158	0.294496	-2.45218	0.0141993	0.127574		-1.01389	0.294521	-3.4425	0.000576356	0.00868114
ENSMUSG00000039936	Pik3cd	183.75		0.457308	0.246627	1.85425	0.0637034	0.181596		-0.928166	0.349158	-2.6583	0.00785357	0.0853947		-1.38547	0.34874	-3.9728	7.10337e-05	0.0015426
ENSMUSG00000040253	Gbp7	374.757		0.257605	0.212549	1.21198	0.225521	0.423626		-0.796949	0.296439	-2.68841	0.00717934	0.0800777		-1.05455	0.296792	-3.55317	0.000380611	0.00622236
ENSMUSG00000040455	Usp45	543.248		0.435009	0.170962	2.54448	0.0109442	0.0531033		-0.583327	0.232832	-2.50536	0.0122326	0.114969		-1.01834	0.232687	-4.37642	1.20647e-05	0.000348987
ENSMUSG00000042035	Igsf3	87.6666		0.594653	0.305336	1.94754	0.0514706	0.156704		-1.30098	0.448893	-2.89819	0.00375325	0.0495799		-1.89563	0.447441	-4.2366	2.26928e-05	0.000608066
ENSMUSG00000044934	Zfp367	618.981		0.293594	0.241565	1.21538	0.224219	0.422089		-0.976937	0.323738	-3.01768	0.0025472	0.0367182		-1.27053	0.323818	-3.9236	8.72368e-05	0.00183956
ENSMUSG00000044951	Mylk4	3878.54		1.45863	0.697626	2.09085	0.0365412	0.124489		-2.2883	0.924649	-2.47477	0.0133321	0.122315		-3.74693	0.924545	-4.05273	5.06237e-05	0.00116731
ENSMUSG00000047030	Spata2	132.201		0.517459	0.270113	1.91571	0.0554018	0.165118		-0.825868	0.373122	-2.2134	0.0268702	0.190883		-1.34333	0.372434	-3.60688	0.000309898	0.00527987
ENSMUSG00000047963	Stbd1	577.641		0.220816	0.298093	0.740763	0.458837	0.661659		-1.38143	0.399687	-3.45628	0.00054768	0.0112814		-1.60225	0.399828	-4.00734	6.1406e-05	0.00136692
ENSMUSG00000054640	Slc8a1	179.525		0.435174	0.245993	1.76905	0.0768863	0.20569		-1.07178	0.352023	-3.04463	0.0023297	0.034239		-1.50695	0.3517	-4.28477	1.82929e-05	0.000500304
ENSMUSG00000055489	Ano5	4116.5		0.620549	0.270772	2.29178	0.0219186	0.0872507		-1.19571	0.359017	-3.33051	0.000866865	0.0161314		-1.81626	0.358978	-5.05953	4.203e-07	1.83645e-05
ENSMUSG00000055782	Abcd2	1844.23		0.120024	0.201236	0.596432	0.550887	0.736149		-0.945411	0.268267	-3.52414	0.000424861	0.00910771		-1.06544	0.268403	-3.96954	7.20121e-05	0.00156151
ENSMUSG00000057716	Tmem178b	27.2361		0.776007	0.406268	1.91009	0.0561222	0.166718		-1.63662	0.664796	-2.46183	0.0138229	0.125295		-2.41262	0.659561	-3.65792	0.000254267	0.00447892
ENSMUSG00000058070	Eml1	1408.63		0.398892	0.212232	1.87951	0.0601743	0.174686		-0.778543	0.282399	-2.75689	0.00583534	0.0690846		-1.17744	0.282379	-4.16969	3.05008e-05	0.000774496
ENSMUSG00000061723	Tnnt3	214678		0.425044	0.222599	1.90946	0.0562026	0.166788		-0.743604	0.294484	-2.5251	0.0115664	0.111562		-1.16865	0.294484	-3.96846	7.23401e-05	0.00156629
ENSMUSG00000061816	Myl1	110668		0.433645	0.292138	1.48438	0.137707	0.306185		-1.30213	0.386501	-3.36903	0.000754341	0.0144835		-1.73578	0.3865	-4.49101	7.0887e-06	0.000218056
ENSMUSG00000062511	4930512M02Rik	24.1039		0.566215	0.68172	0.830569	0.406217	0.613511		-3.61098	1.23149	-2.93221	0.00336564	0.0454865		-4.1772	1.22983	-3.39656	0.000682374	0.00997844
ENSMUSG00000062937	Mtap	165.591		0.779544	0.344717	2.2614	0.0237344	0.0921323		-1.53345	0.478213	-3.20663	0.00134301	0.0229472		-2.313	0.477081	-4.84822	1.24572e-06	4.87236e-05
ENSMUSG00000063275	Hacd1	1302.51		0.588117	0.319901	1.83844	0.0659982	0.185592		-1.03932	0.425455	-2.44284	0.0145721	0.129924		-1.62744	0.425354	-3.82607	0.000130204	0.00253366
ENSMUSG00000066632	Pgk1-rs7	5731.7		0.610312	0.259609	2.35089	0.0187286	0.0785397		-1.07388	0.344071	-3.12111	0.00180169	0.0286656		-1.6842	0.34404	-4.89534	9.81337e-07	3.99957e-05
ENSMUSG00000067194	Eif1ax	2309.71		0.360658	0.198963	1.81269	0.0698804	0.192759		-0.663368	0.264508	-2.50793	0.0121439	0.114752		-1.02403	0.264509	-3.87142	0.000108204	0.00218494
ENSMUSG00000069008	Gm5537	2805.61		0.600325	0.277046	2.16687	0.0302444	0.109321		-1.05148	0.367598	-2.86041	0.00423091	0.0545221		-1.65181	0.367545	-4.49416	6.98438e-06	0.000215569
ENSMUSG00000071711	Mpst	551.334		0.432885	0.232843	1.85913	0.0630088	0.180395		-0.816616	0.312654	-2.61188	0.00900457	0.0935942		-1.2495	0.31256	-3.99763	6.39794e-05	0.00141449
ENSMUSG00000078515	Ddi2	777.229		0.311266	0.184658	1.68563	0.0918664	0.233772		-0.866958	0.248078	-3.4947	0.000474595	0.00992874		-1.17822	0.24814	-4.74822	2.05212e-06	7.53998e-05
ENSMUSG00000083240	Gm13453	152.293		0.386578	0.243747	1.58598	0.112744	0.26844		-0.787545	0.344466	-2.28628	0.0222379	0.168912		-1.17412	0.344351	-3.40966	0.000650429	0.00959811
ENSMUSG00000085653	Gm15179	69.5297		0.924937	0.290662	3.18218	0.00146172	0.0117294		-1.30895	0.43199	-3.03006	0.00244507	0.0356034		-2.23389	0.428178	-5.2172	1.81647e-07	8.98966e-06
ENSMUSG00000087080	Gm12199	22.5445		0.258369	0.547926	0.47154	0.637255	0.797963		-5.26586	1.53921	-3.42113	0.000623608	0.0125348		-5.52422	1.53991	-3.58737	0.000334025	0.0055927
ENSMUSG00000090778	Gm3235	26.9737		0.994097	0.491851	2.02114	0.0432658	0.139403		-1.45662	0.709423	-2.05325	0.0400487	0.243917		-2.45072	0.703687	-3.48268	0.000496416	0.00774984
ENSMUSG00000091985	Gm17354	69.6031		0.374101	0.33184	1.12735	0.259594	0.466163		-1.37329	0.483499	-2.84031	0.00450696	0.0572994		-1.74739	0.483432	-3.61455	0.000300872	0.00514418
ENSMUSG00000105176	Gm43668	314.946		0.498275	0.216268	2.30397	0.0212242	0.0854418		-0.75584	0.296215	-2.55166	0.0107212	0.105932		-1.25411	0.295856	-4.23894	2.24581e-05	0.000602889
